# Supplementary material for: Understanding the structure–activity relationship and performance of highly active novel ATRP catalysts
Source: Royal Society of Chemistry journal article supplement (doi:10.1039/d2dt01954j), 2022-01-01
Supplement: d2dt01954j1.pdf [file d2dt01954j1.pdf]

## Electronic Supplementary Information (ESI)

### Understanding Structure-Activity Relations and Performance of Highly Active Novel ATRP Catalysts

Konstantin W. Kröckert,<sup>a</sup> Felix Garg,<sup>a</sup> Michel V. Heinz,<sup>a</sup> Justin Lange,<sup>a</sup> Patricia P. Simões,<sup>a</sup> Regina Schmidt,<sup>a</sup> Olga Bienemann,<sup>b</sup> Alexander Hoffmann<sup>a</sup> and Sonja Herres-Pawlis\*<sup>a</sup>

#### Table of Contents

|                                           |    |
|-------------------------------------------|----|
| Crystallographic Data and Parameters..... | 2  |
| Cyclic voltammograms .....                | 6  |
| Polymerisation kinetics.....              | 9  |
| NMR-spectra.....                          | 15 |
| UV/Vis spectra .....                      | 22 |
| EPR-spectra.....                          | 24 |

<sup>a</sup> Institut für Anorganische Chemie, RWTH Aachen University, Landoltweg 1a, 52074 Aachen (Germany). E-mail: sonja.herres-pawlis@ac.rwth-aachen.de

<sup>b</sup> Fakultät für Chemie und Chemische Biologie, Technische Universität Dortmund, Otto-Hahn-Str.6, 44227 Dortmund (Germany).

## Crystallographic Data and Parameters

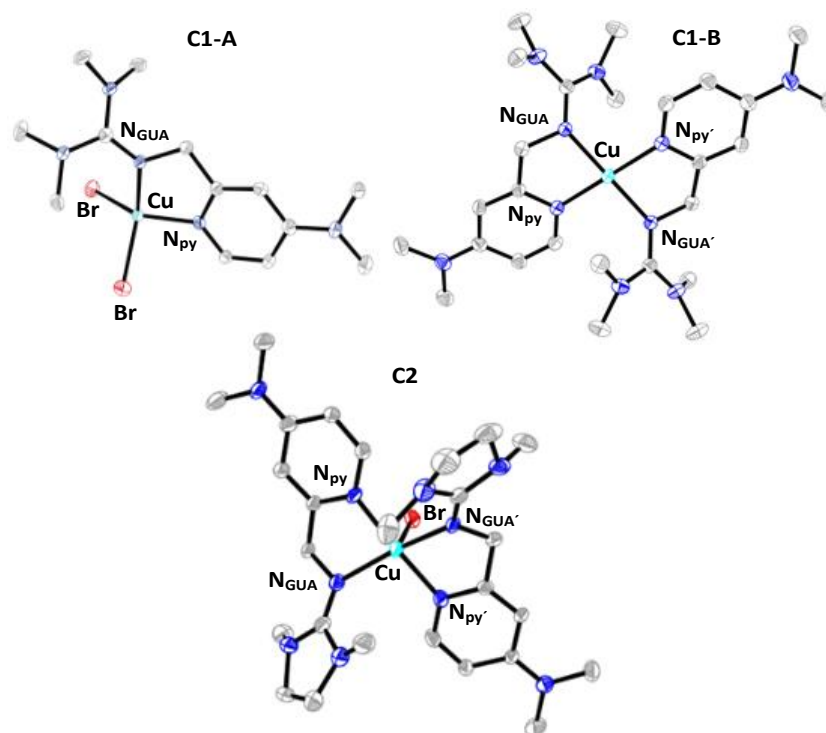

**Fig. S1** Molecular structure of the complex in crystals of  $[\text{Cu}(\text{TMGm4NMe}_2\text{py})\text{Br}_2]$  (**C1-A**) and of the cationic complex units in crystals of  $[\text{Cu}(\text{TMGm4NMe}_2\text{py})_2]\text{Br}_2$  (**C1-B**) and  $[\text{Cu}(\text{DMEGm4NMe}_2\text{py})_2]\text{Br}\cdot\text{C}_5\text{H}_{12}$  (**C2**) in the solid state (ellipsoids drawn at the 50% probability level). H atoms and solvent molecules are omitted for clarity.

**Table S1** Crystallographic data and parameters of the Cu(II) complexes  $[\text{Cu}(\text{TMGm4NMe}_2\text{py})\text{Br}_2]$  (**C1-A**),  $[\text{Cu}(\text{TMGm4NMe}_2\text{py})_2]\text{Br}_2$  (**C1-B**),  $[\text{Cu}(\text{DMEGm4NMe}_2\text{py})_2]\text{Br}\cdot\text{C}_5\text{H}_{12}$  (**C2**).

| Complex/Ligand                                                  | <b>C1-A</b>                                         | <b>C1-B</b>                                            | <b>C2</b>                                                                             |
|-----------------------------------------------------------------|-----------------------------------------------------|--------------------------------------------------------|---------------------------------------------------------------------------------------|
| Empirical formula                                               | $\text{C}_{13}\text{H}_{23}\text{Br}_2\text{CuN}_5$ | $\text{C}_{26}\text{H}_{46}\text{Br}_2\text{CuN}_{10}$ | $\text{C}_{26}\text{H}_{42}\text{Br}_2\text{CuN}_{10} [\cdot\text{C}_5\text{H}_{12}]$ |
| Formula mass [ $\text{g mol}^{-1}$ ]                            | 472.72                                              | 722.09                                                 | 718.05                                                                                |
| Crystal size [mm]                                               | 0.15 x 0.14 x 0.12                                  | 0.35 x 0.30 x 0.24                                     | 0.18 x 0.17 x 0.04                                                                    |
| T [K]                                                           | 100(2)                                              | 100                                                    | 100(2)                                                                                |
| Crystal system                                                  | Monoclinic                                          | Triclinic                                              | Monoclinic                                                                            |
| Space group                                                     | $P2_1/n$                                            | $P-1$                                                  | $P2_1/c$                                                                              |
| a [ $\text{\AA}$ ]                                              | 8.7711(18)                                          | 9.2630(19)                                             | 12.868(3)                                                                             |
| b [ $\text{\AA}$ ]                                              | 19.273(4)                                           | 9.5980(19)                                             | 21.016(4)                                                                             |
| c [ $\text{\AA}$ ]                                              | 10.732(2)                                           | 10.712(2)                                              | 13.142(3)                                                                             |
| $\alpha$ [ $^\circ$ ]                                           | 90                                                  | 77.80(3)                                               | 90                                                                                    |
| $\beta$ [ $^\circ$ ]                                            | 103.29(3)                                           | 66.20(3)                                               | 94.75(3)                                                                              |
| $\gamma$ [ $^\circ$ ]                                           | 90                                                  | 83.30(3)                                               | 90                                                                                    |
| V [ $\text{\AA}^3$ ]                                            | 1765.6(7)                                           | 851.2(4)                                               | 3541.9(12)                                                                            |
| Z                                                               | 4                                                   | 1                                                      | 4                                                                                     |
| $\rho_{\text{calcd.}}$ [ $\text{g cm}^{-3}$ ]                   | 1.778                                               | 1.409                                                  | 1.347                                                                                 |
| $\mu$ [ $\text{mm}^{-1}$ ]                                      | 5.764                                               | 3.020                                                  | 2.903                                                                                 |
| $\lambda$ [ $\text{\AA}$ ]                                      | 0.71073                                             | 0.71073                                                | 0.71073                                                                               |
| F(000)                                                          | 940                                                 | 371                                                    | 1468                                                                                  |
| hkl range                                                       | -10/10, -23/23, -13/13                              | -13/13, -14/14, -15/15                                 | -17/18, -30/29, -18/18                                                                |
| Reflections collected                                           | 21006                                               | 16399                                                  | 51931                                                                                 |
| Independent reflections                                         | 3465                                                | 5899                                                   | 10461                                                                                 |
| $R_{\text{int}}$                                                | 0.0279                                              | 0.0290                                                 | 0.0781                                                                                |
| No. parameters                                                  | 196                                                 | 200                                                    | 360                                                                                   |
| $R_1$ [ $I \geq 2\sigma(I)$ ]                                   | 0.0532                                              | 0.0757                                                 | 0.0737                                                                                |
| w $R_2$ (all data)                                              | 0.1221                                              | 0.2248                                                 | 0.1757                                                                                |
| Goodness-of-fit                                                 | 1.196                                               | 1.125                                                  | 1.035                                                                                 |
| $\Delta\rho_{\text{fin}}$ max/min [ $\text{e}\text{\AA}^{-3}$ ] | 2.028/-1.174                                        | 2.412/-1.835                                           | 1.124/-0.760                                                                          |

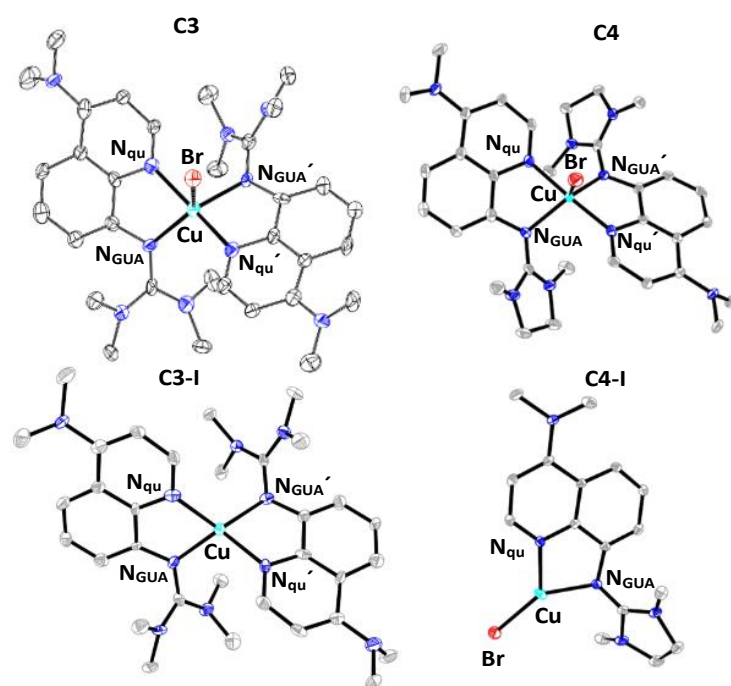

**Fig. S2** Molecular structure of the cationic complex units in crystals of  $[\text{Cu}(\text{TMG4NMe}_2\text{qu})_2\text{Br}]\text{Br} \cdot 2 \text{C}_4\text{H}_{10}\text{O}$  (**C3**),  $[\text{Cu}(\text{TMG4NMe}_2\text{qu})_2]\text{Br} \cdot \text{THF} \cdot \text{CH}_2\text{Cl}_2$  (**C3-I**),  $[\text{Cu}(\text{DMEG4NMe}_2\text{qu})_2\text{Br}]\text{Br} \cdot \text{CH}_3\text{CN}$  (**C4**) and of the complex in crystals of  $[\text{Cu}(\text{DMEG4NMe}_2\text{qu})\text{Br}]$  (**C4-I**) in the solid state (ellipsoids drawn at the 50% probability level). H atoms and solvent molecules are omitted for clarity.

**Table S2** Crystallographic data and parameters of the Cu(II) complexes  $[\text{Cu}(\text{TMG4NMe}_2\text{qu})_2\text{Br}]\text{Br} \cdot 2 \text{C}_4\text{H}_{10}\text{O}$  (**C3**) and  $[\text{Cu}(\text{DMEG4NMe}_2\text{qu})\text{Br}]\text{Br} \cdot \text{CH}_3\text{CN}$  (**C4**) and of the Cu(I) complexes  $[\text{Cu}(\text{TMG4NMe}_2\text{qu})_2]\text{Br} \cdot \text{THF} \cdot \text{CH}_2\text{Cl}_2$  (**C3-I**) and  $[\text{Cu}(\text{DMEG4NMe}_2\text{qu})\text{Br}]$  (**C4-I**).

| Complex                                                         | <b>C3</b>                                                                                    | <b>C3-I</b>                                                                               | <b>C4</b>                                                                       | <b>C4-I</b>                                |
|-----------------------------------------------------------------|----------------------------------------------------------------------------------------------|-------------------------------------------------------------------------------------------|---------------------------------------------------------------------------------|--------------------------------------------|
| Empirical formula                                               | $\text{C}_{32}\text{H}_{46}\text{Br}_2\text{CuN}_{10} [+ 2 \text{C}_4\text{H}_{10}\text{O}]$ | $\text{C}_{33}\text{H}_{48}\text{BrCl}_2\text{CuN}_{10} [+ \text{C}_4\text{H}_8\text{O}]$ | $\text{C}_{32}\text{H}_{42}\text{Br}_2\text{CuN}_{10} [+ \text{CH}_3\text{CN}]$ | $\text{C}_{16}\text{H}_{21}\text{BrCuN}_5$ |
| Formula mass [ $\text{g mol}^{-1}$ ]                            | 794.15                                                                                       | 799.16                                                                                    | 790.11                                                                          | 426.83                                     |
| Crystal size [mm]                                               | 0.62 x 0.16 x 0.15                                                                           | 0.18 x 0.16 x 0.14                                                                        | 0.28 x 0.16 x 0.10                                                              | 0.14 x 0.11 x 0.06                         |
| T [K]                                                           | 100(2)                                                                                       | 100(2)                                                                                    | 100(2)                                                                          | 100(2)                                     |
| Crystal system                                                  | Triclinic                                                                                    | Orthorhombic                                                                              | Triclinic                                                                       | Monoclinic                                 |
| Space group                                                     | $P\bar{1}$                                                                                   | $P2_12_12_1$                                                                              | $P\bar{1}$                                                                      | $P2_1/c$                                   |
| a [ $\text{\AA}$ ]                                              | 11.581(2)                                                                                    | 11.531(2)                                                                                 | 11.840(2)                                                                       | 14.212(3)                                  |
| b [ $\text{\AA}$ ]                                              | 13.967(3)                                                                                    | 14.073(3)                                                                                 | 12.829(3)                                                                       | 8.3493(17)                                 |
| c [ $\text{\AA}$ ]                                              | 14.017(3)                                                                                    | 25.526(5)                                                                                 | 13.614(3)                                                                       | 14.873(3)                                  |
| $\alpha$ [ $^\circ$ ]                                           | 72.17(3)                                                                                     | 90                                                                                        | 64.90(3)                                                                        | 90                                         |
| $\beta$ [ $^\circ$ ]                                            | 85.97(3)                                                                                     | 90                                                                                        | 88.44(3)                                                                        | 106.54(3)                                  |
| $\gamma$ [ $^\circ$ ]                                           | 73.20(3)                                                                                     | 90                                                                                        | 73.15(3)                                                                        | 90                                         |
| V [ $\text{\AA}^3$ ]                                            | 2065.8(9)                                                                                    | 4142.5(14)                                                                                | 1781.3(8)                                                                       | 1691.7(6)                                  |
| Z                                                               | 2                                                                                            | 4                                                                                         | 2                                                                               | 4                                          |
| $\rho_{\text{calcd.}}$ [ $\text{g cm}^{-3}$ ]                   | 1.277                                                                                        | 1.281                                                                                     | 1.473                                                                           | 1.676                                      |
| $\mu$ [ $\text{mm}^{-1}$ ]                                      | 2.495                                                                                        | 1.655                                                                                     | 2.893                                                                           | 3.659                                      |
| $\lambda$ [ $\text{\AA}$ ]                                      | 0.71073                                                                                      | 0.71073                                                                                   | 0.71073                                                                         | 0.71073                                    |
| F(000)                                                          | 814                                                                                          | 1656                                                                                      | 806                                                                             | 864                                        |
| hkl range                                                       | -13/13, -16/16, -16/16                                                                       | -13/13, -17/17, -25/30                                                                    | -15/15, -16/11, -17/17                                                          | -22/20, -12/12, -22/22                     |
| Reflections collected                                           | 17230                                                                                        | 22375                                                                                     | 26137                                                                           | 39814                                      |
| Independent reflections                                         | 7618                                                                                         | 7538                                                                                      | 7747                                                                            | 6522                                       |
| $R_{\text{int.}}$                                               | 0.1633                                                                                       | 0.0450                                                                                    | 0.0503                                                                          | 0.0655                                     |
| No. parameters                                                  | 418                                                                                          | 436                                                                                       | 414                                                                             | 212                                        |
| $R_1$ [ $I \geq 2\sigma(I)$ ]                                   | 0.0686                                                                                       | 0.0659                                                                                    | 0.0567                                                                          | 0.0457                                     |
| w $R_2$ (all data)                                              | 0.1599                                                                                       | 0.1359                                                                                    | 0.1520                                                                          | 0.1194                                     |
| Goodness-of-fit                                                 | 0.788                                                                                        | 1.256                                                                                     | 1.095                                                                           | 1.022                                      |
| Absolute structure parameter                                    |                                                                                              | 0.003(9)                                                                                  |                                                                                 |                                            |
| $\Delta\rho_{\text{min}}$ max/min [ $\text{e}\text{\AA}^{-3}$ ] | 1.093/-1.035                                                                                 | 0.844/-0.580                                                                              | 1.301/-1.183                                                                    | 0.906/-1.253                               |

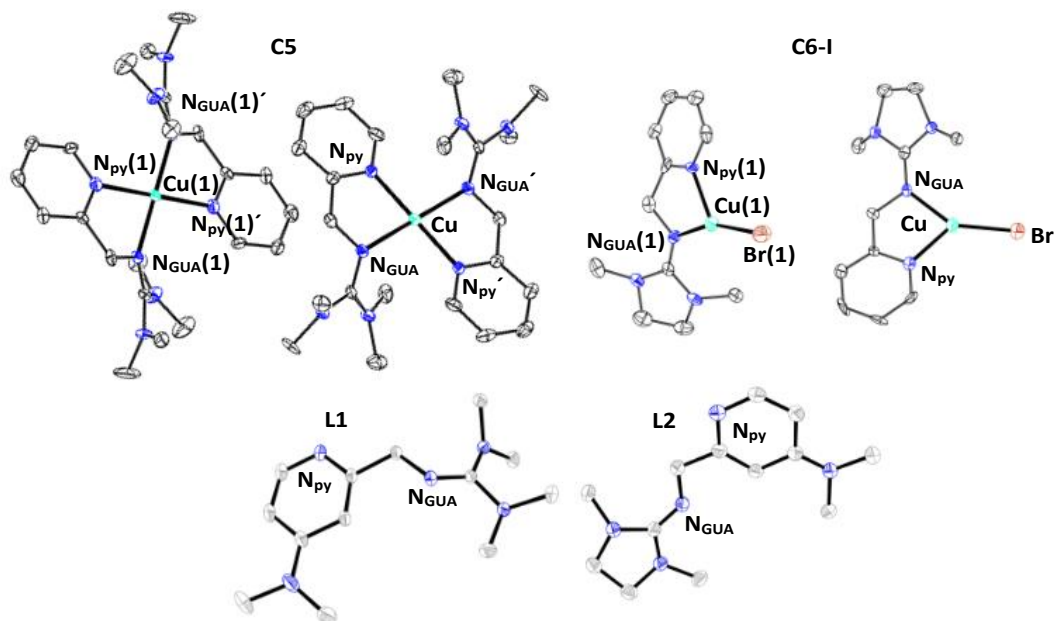

**Fig. S3** Molecular structure of the cationic complex unit in crystals of  $[\text{Cu}(\text{TMGPpy})_2]\text{Br}_2$  (**C5**) and of the ligand or the complex in crystals of  $\text{TMGm4NMe}_2\text{py}$  (**L1**),  $\text{DMEGm4NMe}_2\text{py}$  (**L2**), and  $[\text{Cu}(\text{DMEGpy})\text{Br}]$  (**C6-I**) in the solid state (ellipsoids drawn at the 50% probability level). H atoms and solvent molecules are omitted for clarity. In **C5** and **C6-I** two independent molecules per asymmetric unit are present.

**Table S3** Crystallographic data and parameters of the Cu(II) complex  $[\text{Cu}(\text{TMGPpy})_2]\text{Br}_2$  (**C5**), of the Cu(I) complex  $[\text{Cu}(\text{DMEGpy})\text{Br}]$  (**C6-I**) and of the ligands  $\text{TMGm4NMe}_2\text{py}$  (**L1**) and  $\text{DMEGm4NMe}_2\text{py}$  (**L2**).

| Complex                                                       | <b>C5</b>                                           | <b>C6-I</b>                                | <b>L1</b>                              | <b>L2</b>                              |
|---------------------------------------------------------------|-----------------------------------------------------|--------------------------------------------|----------------------------------------|----------------------------------------|
| Empirical formula                                             | $\text{C}_{22}\text{H}_{36}\text{Br}_2\text{CuN}_8$ | $\text{C}_{11}\text{H}_{16}\text{BrCuN}_4$ | $\text{C}_{13}\text{H}_{23}\text{N}_5$ | $\text{C}_{13}\text{H}_{21}\text{N}_5$ |
| Formula mass [ $\text{g mol}^{-1}$ ]                          | 635.95                                              | 347.73                                     | 249.36                                 | 247.35                                 |
| Crystal size [mm]                                             | 0.25 x 0.12 x 0.09                                  | 0.24 x 0.07 x 0.06                         | 0.16 x 0.14 x 0.12                     | 0.22 x 0.13 x 0.08                     |
| T [K]                                                         | 173(2)                                              | 173(2)                                     | 100(2)                                 | 100(2)                                 |
| Crystal system                                                | Triclinic                                           | Monoclinic                                 | Monoclinic                             | Monoclinic                             |
| Space group                                                   | $P\bar{1}$                                          | $P2_1/c$                                   | $P2_1/c$                               | $P2_1/c$                               |
| a [Å]                                                         | 9.0168(7)                                           | 13.9718(8)                                 | 7.7101(15)                             | 7.2681(15)                             |
| b [Å]                                                         | 9.9820(7)                                           | 8.0130(6)                                  | 8.2333(16)                             | 12.646(3)                              |
| c [Å]                                                         | 14.8745(10)                                         | 23.5855(15)                                | 21.676(4)                              | 14.978(3)                              |
| $\alpha$ [°]                                                  | 77.378(6)                                           | 90                                         | 90                                     | 90                                     |
| $\beta$ [°]                                                   | 86.558(6)                                           | 99.071(6)                                  | 94.89(3)                               | 103.60(3)                              |
| $\gamma$ [°]                                                  | 87.412(6)                                           | 90                                         | 90                                     | 90                                     |
| V [Å <sup>3</sup> ]                                           | 1303.37(16)                                         | 2607.5(3)                                  | 1371.0(5)                              | 1338.1(5)                              |
| Z                                                             | 2                                                   | 8                                          | 4                                      | 4                                      |
| $\rho_{\text{calcd.}}$ [ $\text{g cm}^{-3}$ ]                 | 1.620                                               | 1.772                                      | 1.208                                  | 1.228                                  |
| $\mu$ [ $\text{mm}^{-1}$ ]                                    | 3.930                                               | 4.723                                      | 0.076                                  | 0.612                                  |
| $\lambda$ [Å]                                                 | 0.71073                                             | 0.71073                                    | 0.71073                                | 1.54186                                |
| F(000)                                                        | 646                                                 | 1392                                       | 544                                    | 536                                    |
| hkl range                                                     | -10/10, -12/11, -18/17                              | -16/16, -9/9, -28/28                       | -11/6, -12/11, -30/32                  | -8/8, -10/15, -17/12                   |
| Reflections collected                                         | 11081                                               | 20124                                      | 13904                                  | 6480                                   |
| Independent reflections                                       | 4817                                                | 4842                                       | 4924                                   | 2369                                   |
| $R_{\text{int.}}$                                             | 0.0443                                              | 0.0655                                     | 0.0311                                 | 0.0210                                 |
| No. parameters                                                | 309                                                 | 311                                        | 169                                    | 167                                    |
| $R_1$ [ $I \geq 2\sigma(I)$ ]                                 | 0.0544                                              | 0.0353                                     | 0.0556                                 | 0.0441                                 |
| w $R_2$ (all data)                                            | 0.1783                                              | 0.0443                                     | 0.1520                                 | 0.1313                                 |
| Goodness-of-fit                                               | 1.188                                               | 0.830                                      | 1.081                                  | 1.073                                  |
| $\Delta\rho_{\text{min}}$ max/min [ $\text{e}\text{Å}^{-3}$ ] | 1.378/-0.699                                        | 0.923/-0.659                               | 0.417/-0.275                           | 0.249/-0.245                           |

**Table S4:** Key bond lengths, angles and geometrical factors of the complexes [Cu(TMGu)<sub>2</sub>Br]Br,<sup>1</sup> [Cu(TMGu)<sub>2</sub>]Br,<sup>1</sup> [Cu(DMEGu)<sub>2</sub>Br]Br<sup>1</sup> and [Cu(DMEGu)<sub>2</sub>]Br.<sup>1</sup>

| Complex                                        | [Cu(TMGu) <sub>2</sub> Br]Br | [Cu(TMGu) <sub>2</sub> ]Br | [Cu(DMEGu) <sub>2</sub> Br]Br | [Cu(DMEGu) <sub>2</sub> ]Br |
|------------------------------------------------|------------------------------|----------------------------|-------------------------------|-----------------------------|
| <b>Bond lengths [Å]</b>                        |                              |                            |                               |                             |
| Cu-N <sub>GUA</sub> (L1)                       | 2.051(7)                     | 2.118(2)                   | 2.052(5)                      | 2.101(2)                    |
| Cu-N <sub>GUA</sub> (L2)                       | 2.052(7)                     | 2.125(2)                   | 2.125(4)                      | 2.116(2)                    |
| Cu-N <sub>qu</sub> (L1)                        | 1.971(7)                     | 1.987(2)                   | 1.958(5)                      | 1.968(3)                    |
| Cu-N <sub>qu</sub> (L2)                        | 1.979(7)                     | 1.974(2)                   | 1.956(4)                      | 1.963(3)                    |
| Cu-Br (1)                                      | 2.663(2)                     | -                          | 2.593(1)                      | -                           |
| C <sub>GUA</sub> =N <sub>GUA</sub> (L1)        | 1.34(2)                      | 1.326(2)                   | 1.349(7)                      | 1.318(4)                    |
| C <sub>GUA</sub> -N <sub>am</sub> (L1) (∅)     | 1.35(2)                      | 1.363(2)                   | 1.336(8)                      | 1.352(4)                    |
| C <sub>GUA</sub> =N <sub>GUA</sub> (L2)        | 1.37(2)                      | 1.327(2)                   | 1.341(8)                      | 1.314(4)                    |
| C <sub>GUA</sub> -N <sub>am</sub> (L2) (∅)     | 1.35(2)                      | 1.356(2)                   | 1.341(9)                      | 1.353(4)                    |
| <b>Bond angles [°]</b>                         |                              |                            |                               |                             |
| N <sub>GUA</sub> (L1)-Cu-N <sub>GUA</sub> (L2) | 131.4(3)                     | 127.0(1)                   | 127.8(1)                      | 127.8(1)                    |
| N <sub>qu</sub> (L1)-Cu-N <sub>qu</sub> (L2)   | 174.8(3)                     | 150.9(1)                   | 178.7(2)                      | 153.8(1)                    |
| N <sub>GUA</sub> (L1)-Cu-Br (1)                | 127.4(2)                     | -                          | 137.8(2)                      | -                           |
| <b>Geometrical factors</b>                     |                              |                            |                               |                             |
| τ <sub>4</sub> <sup>[a]</sup>                  | -                            | 0.58                       | -                             | 0.55                        |
| τ <sub>5</sub> <sup>[b]</sup>                  | 0.72                         | -                          | 0.68                          | -                           |
| ρ <sup>[c]</sup>                               | 1.01                         | 0.98                       | 1.01                          | 0.97                        |
| ∠ (CuN2 (L1/L2)) [°]                           | 50.2(2)                      | 65.6(1)                    | 57.0(2)                       | 63.5(1)                     |

[a]  $\tau_4 = \frac{360^\circ - (\alpha + \beta)}{141}$ . A  $\tau_4$  value of 0 is found in ideal square planar complexes where a  $\tau_4$  value of 1 is found in ideal tetrahedral complexes.<sup>2</sup>

[b]  $\tau_5 = \frac{(\alpha - \beta)}{60}$ . A  $\tau_5$  value of 0 is found in ideal square-based pyramidal complexes where a  $\tau_5$  value of 1 is found in ideal trigonal bipyramidal complexes.<sup>3</sup>

[c]  $\rho = \frac{2a}{(b+c)}$  with  $a = d(\text{C}_{\text{GUA}}=\text{N}_{\text{GUA}})$  and  $b$  and  $c = d(\text{C}_{\text{GUA}}=\text{N}_{\text{am}})$ . Average  $\rho$ -values of two guanidine moieties.<sup>4</sup>

## Cyclic voltammograms

**Table S5** Additional data and parameters to the cyclic voltammograms of the  $[\text{Cu}(\text{TMGm4NMe}_2\text{py})_2]^+ / [\text{Cu}(\text{TMGm4NMe}_2\text{py})_2]^{2+}$  couple starting from a 1 mM  $[\text{Cu}(\text{TMGm4NMe}_2\text{py})_2]\text{Br}_2$  (C1-B) complex solution in MeCN.

|                                                                                       | 20 mV/s                | 50 mV/s                | 100 mV/s               | 200 mV/s               |
|---------------------------------------------------------------------------------------|------------------------|------------------------|------------------------|------------------------|
| $E_{\text{ox}}$ vs. SCE [V]                                                           | -0,422                 | -0,418                 | -0,414                 | -0,410                 |
| $E_{\text{red}}$ vs. SCE [V]                                                          | -0,509                 | -0,519                 | -0,525                 | -0,535                 |
| $E_{1/2}$ vs. SCE [V]                                                                 | -0,465                 | -0,468                 | -0,469                 | -0,472                 |
| $\Delta E$ [V]                                                                        | 0,087                  | 0,101                  | 0,111                  | 0,125                  |
| $I_{\text{ox}}$ [A]                                                                   | $8,53 \times 10^{-7}$  | $1,28 \times 10^{-6}$  | $1,68 \times 10^{-6}$  | $2,12 \times 10^{-6}$  |
| $I_{\text{red}}$ [A]                                                                  | $-9,04 \times 10^{-7}$ | $-1,46 \times 10^{-6}$ | $-1,96 \times 10^{-6}$ | $-2,57 \times 10^{-6}$ |
| $I_{\text{red}}/I_{\text{ox}}$                                                        | -1,06                  | -1,14                  | -1,17                  | -1,21                  |
| Current function (ox)<br>[ $\mu\text{A V}^{-0.5} \text{s}^{0.5} \text{mmol}^{-1}$ l]  | $6,03 \times 10^{-6}$  | $5,72 \times 10^{-6}$  | $5,30 \times 10^{-6}$  | $4,75 \times 10^{-6}$  |
| Current function (red)<br>[ $\mu\text{A V}^{-0.5} \text{s}^{0.5} \text{mmol}^{-1}$ l] | $-6,39 \times 10^{-6}$ | $-6,53 \times 10^{-6}$ | $-6,21 \times 10^{-6}$ | $-5,74 \times 10^{-6}$ |

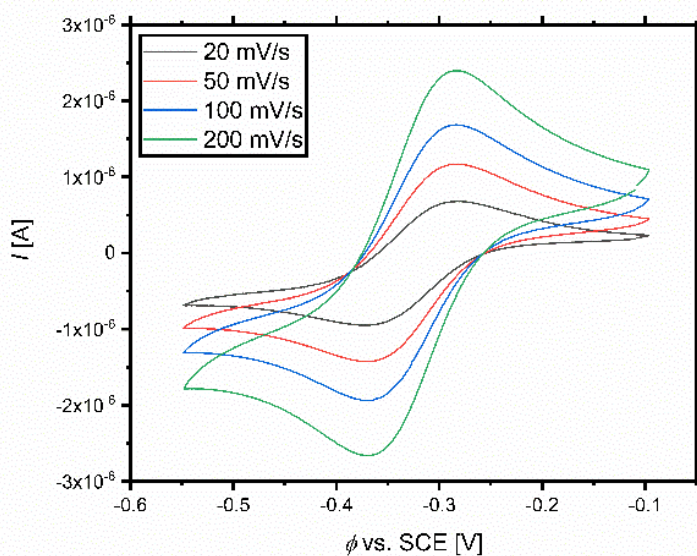

**Fig. S4** Cyclic voltammograms with various scan rates of the  $[\text{Cu}(\text{DMEGm4NMe}_2\text{py})_2]^+ / [\text{Cu}(\text{DMEGm4NMe}_2\text{py})_2]^{2+}$  couple starting from a 1 mM  $[\text{Cu}(\text{DMEGm4NMe}_2\text{py})_2]\text{Br}$  (C2) complex solution in MeCN.

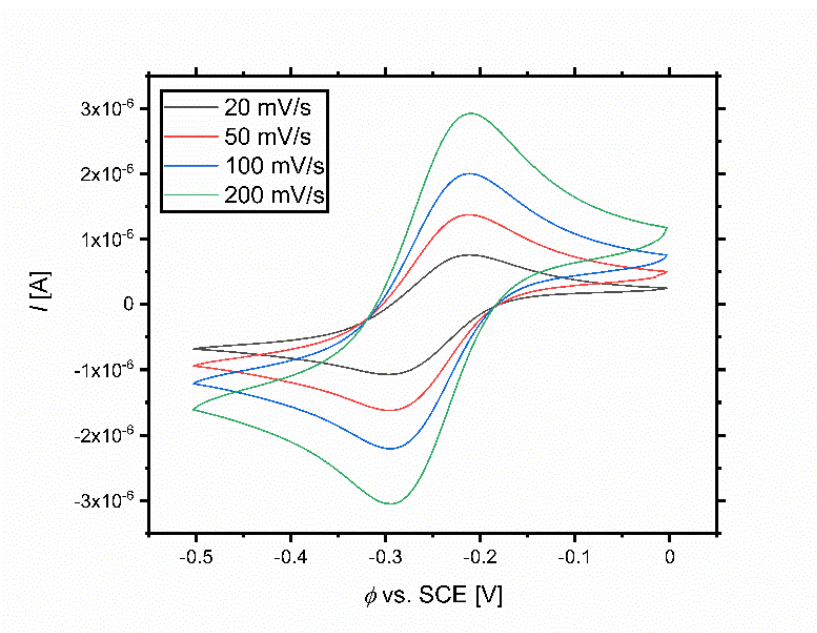

**Fig. S5** Cyclic voltammograms with various scan rates of the  $[\text{Cu}(\text{TMGG4NMe}_2\text{qu})_2]^+ / [\text{Cu}(\text{TMGG4NMe}_2\text{qu})_2]^{2+}$  couple starting from a 1 mM  $[\text{Cu}(\text{TMGG4NMe}_2\text{qu})_2]\text{Br}$  (**C3**) complex solution in MeCN.

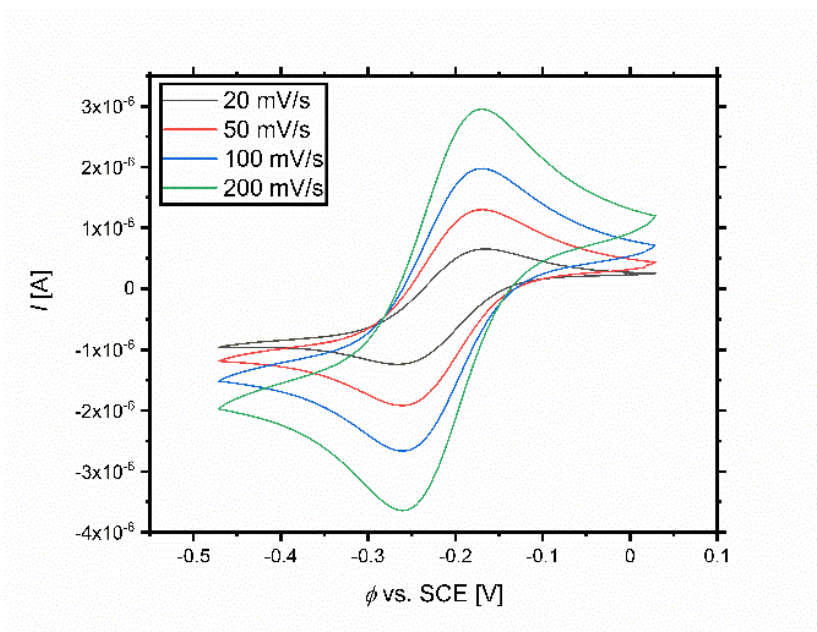

**Fig. S6** Cyclic voltammograms with various scan rates of the  $[\text{Cu}(\text{DMEG4NMe}_2\text{qu})_2]^+ / [\text{Cu}(\text{DMEG4NMe}_2\text{qu})_2]^{2+}$  couple starting from a 1 mM  $[\text{Cu}(\text{DMEG4NMe}_2\text{qu})_2]\text{Br}$  (**C4**) complex solution in MeCN.

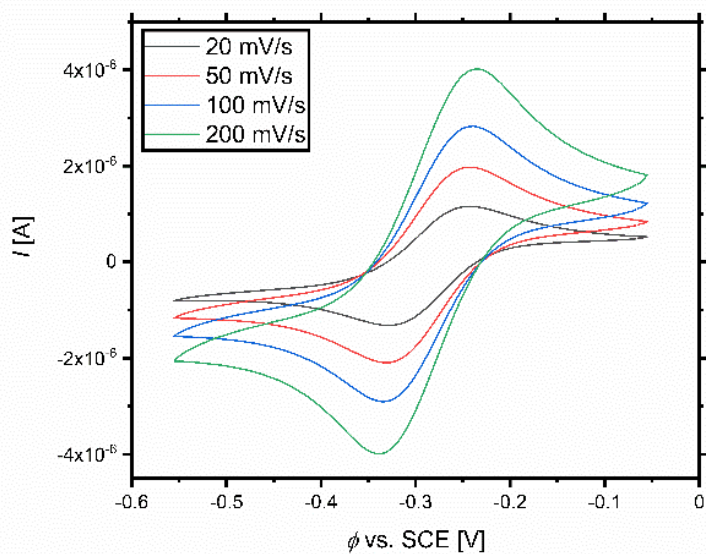

**Fig. S7** Cyclic voltammograms with various scan rates of the [Cu(TMGPpy)<sub>2</sub>]<sup>+</sup>/[Cu(TMGPpy)<sub>2</sub>]<sup>2+</sup> couple starting from a 1 mM [Cu(TMGPpy)<sub>2</sub>Br<sub>2</sub>] (C5) complex solution in MeCN.

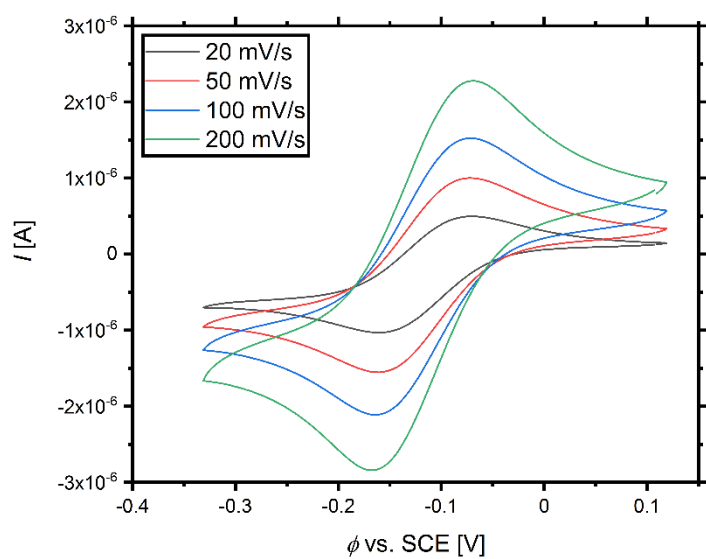

**Fig. S8** Cyclic voltammograms with various scan rates of the [Cu(DMEGpy)<sub>2</sub>]<sup>+</sup>/[Cu(DMEGpy)<sub>2</sub>]<sup>2+</sup> couple starting from a 1 mM [Cu(DMEGpy)<sub>2</sub>Br]Br (C6) complex solution in MeCN.



## Polymerisation kinetics

### Standard ATRP experiments

**Table S6** Used amounts of chemicals and ratios for standard ATRP experiments of styrene in benzonitrile.

|           | Ligand     | CuBr       | EBiB      | Styrene | Ratio (C/I/M) |
|-----------|------------|------------|-----------|---------|---------------|
| <b>L1</b> | 0.38 mmol  | 0.19 mmol  | 0.19 mmol | 19 mmol | 1/1/100       |
| <b>L1</b> | 0.19 mmol  | 0.095 mmol | 0.19 mmol | 19 mmol | 0.5/1/100     |
| <b>L1</b> | 0.038 mmol | 0.19 mmol  | 0.19 mmol | 19 mmol | 0.1/1/100     |
| <b>L2</b> | 0.38 mmol  | 0.19 mmol  | 0.19 mmol | 19 mmol | 1/1/100       |
| <b>L2</b> | 0.19 mmol  | 0.095 mmol | 0.19 mmol | 19 mmol | 0.5/1/100     |
| <b>L2</b> | 0.038 mmol | 0.19 mmol  | 0.19 mmol | 19 mmol | 0.1/1/100     |
| <b>L3</b> | 0.38 mmol  | 0.19 mmol  | 0.19 mmol | 19 mmol | 1/1/100       |
| <b>L3</b> | 0.19 mmol  | 0.095 mmol | 0.19 mmol | 19 mmol | 0.5/1/100     |
| <b>L4</b> | 0.38 mmol  | 0.19 mmol  | 0.19 mmol | 19 mmol | 1/1/100       |
| <b>L4</b> | 0.19 mmol  | 0.095 mmol | 0.19 mmol | 19 mmol | 0.5/1/100     |

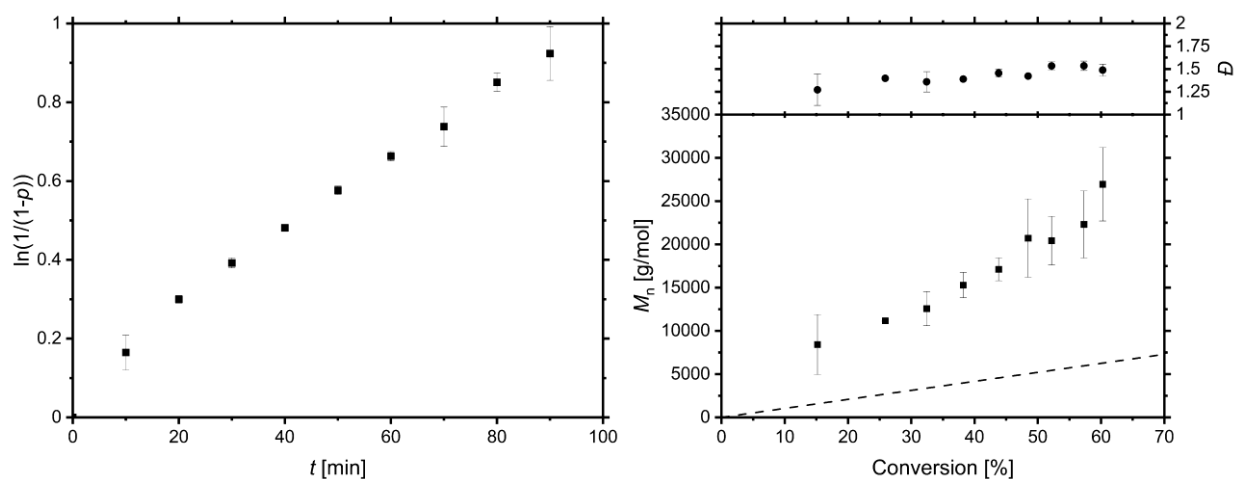

**Fig. S9** Semilogarithmic plot of conversion vs. time (left) and  $M_n/D$  vs. conversion (right) for styrene ATRP experiments with the CuBr/(TMGm4NMe<sub>2</sub>py)<sub>2</sub> catalyst system. Conditions: Styrene/EBiB/Cat. = 100/1/1 in benzonitrile at 110 °C.

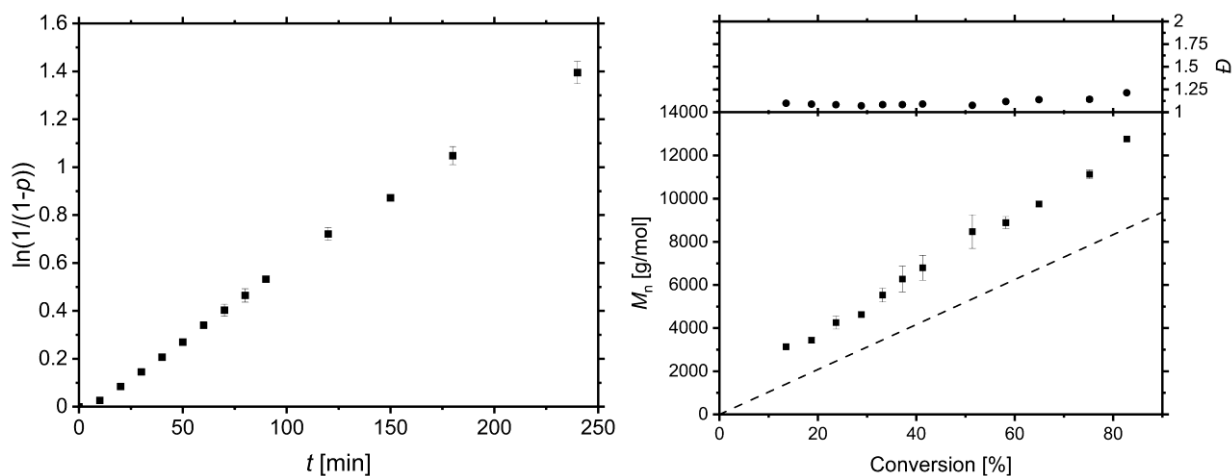

**Fig. S10** Semilogarithmic plot of conversion vs. time (left) and  $M_n/D$  vs. conversion (right) for styrene ATRP experiments with the CuBr/(TMGm4NMe<sub>2</sub>py)<sub>2</sub> catalyst system. Conditions: Styrene/EBiB/Cat. = 100/1/0.5 in benzonitrile at 110 °C.

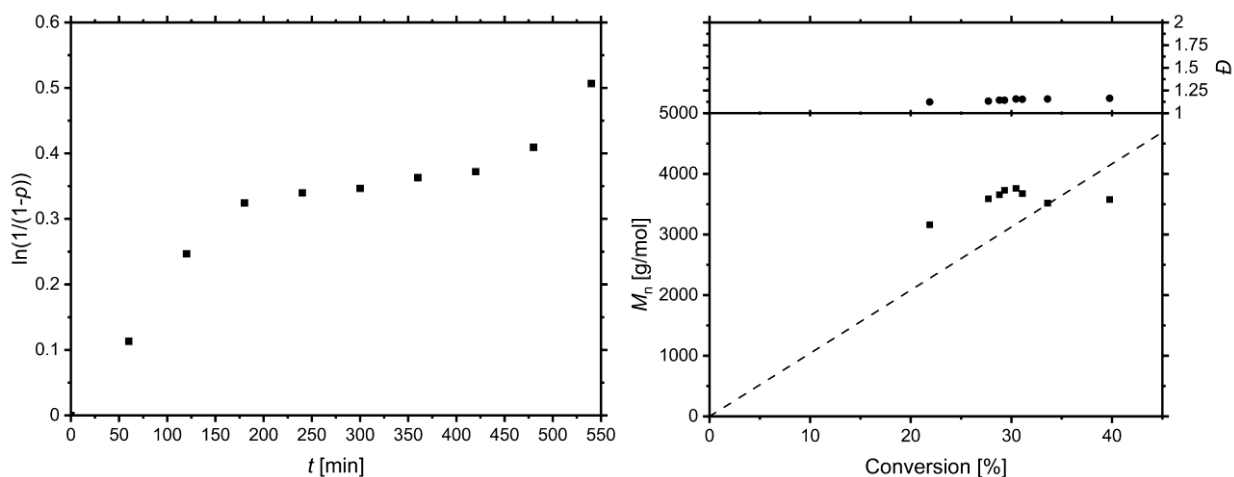

**Fig. S11** Semilogarithmic plot of conversion vs. time (left) and  $M_n/D$  vs. conversion (right) for styrene ATRP experiments with the  $\text{CuBr}/(\text{TMGm4NMe}_2\text{py})_2$  catalyst system. Conditions: Styrene/EBiB/Cat. = 100/1/0.1 in benzonitrile at 110 °C.

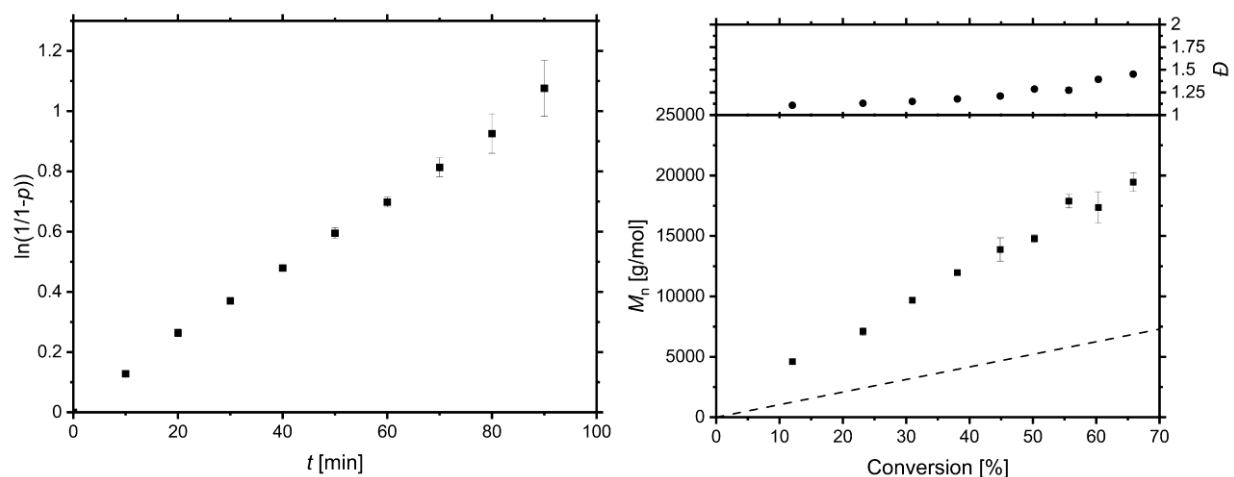

**Fig. S12** Semilogarithmic plot of conversion vs. time (left) and  $M_n/D$  vs. conversion (right) for styrene ATRP experiments with the  $\text{CuBr}/(\text{DMEGm4NMe}_2\text{py})_2$  catalyst system. Conditions: Styrene/EBiB/Cat. = 100/1/1 in benzonitrile at 110 °C.

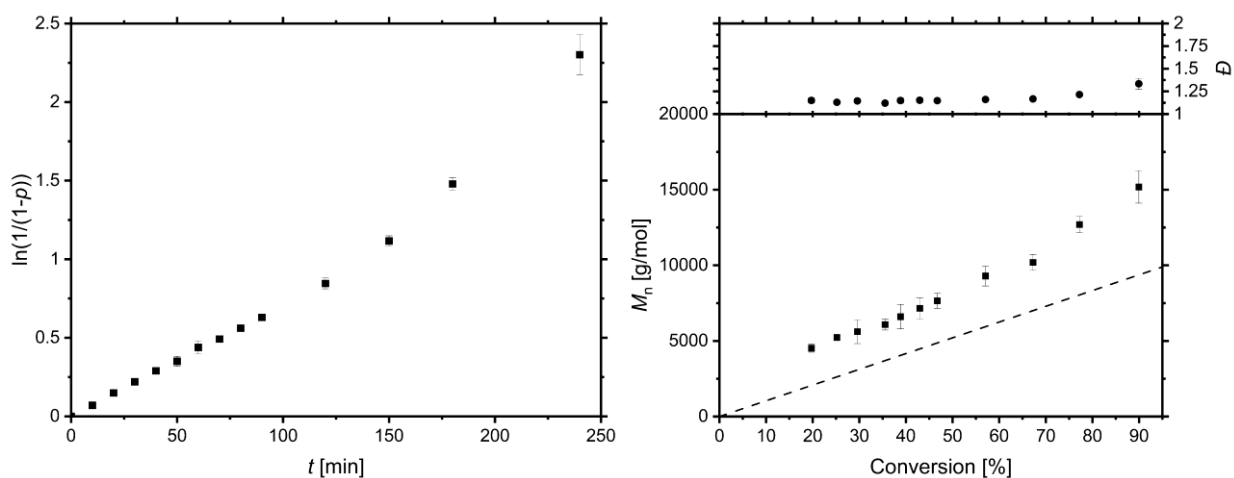

**Fig. S13** Semilogarithmic plot of conversion vs. time (left) and  $M_n/D$  vs. conversion (right) for styrene ATRP experiments with the  $\text{CuBr}/(\text{DMEGm4NMe}_2\text{py})_2$  catalyst system. Conditions: Styrene/EBiB/Cat. = 100/1/0.5 in benzonitrile at 110 °C.

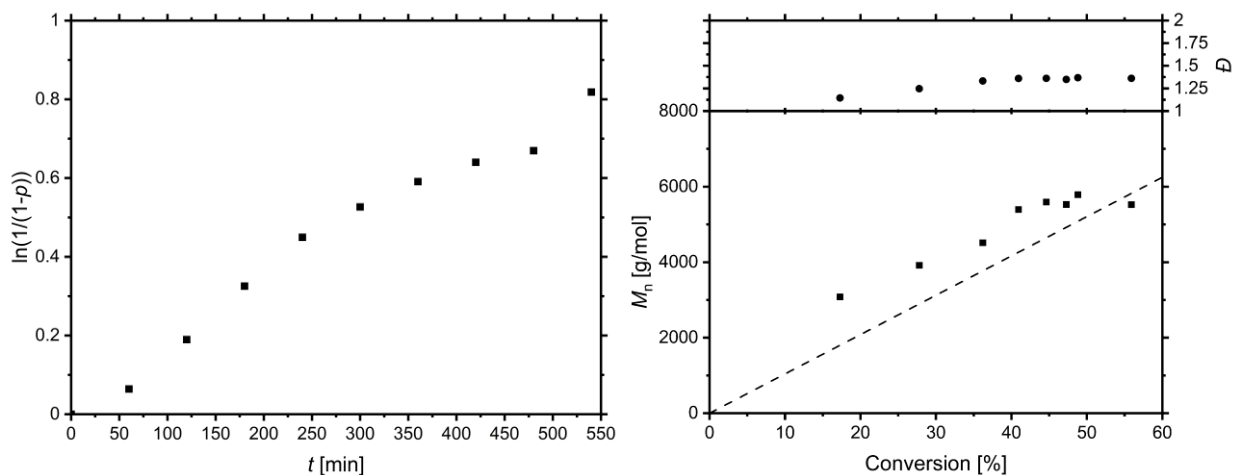

**Fig. S14** Semilogarithmic plot of conversion vs. time (left) and  $M_n/D$  vs. conversion (right) for styrene ATRP experiments with the  $\text{CuBr}/(\text{DMEGm4NMe}_2\text{py})_2$  catalyst system. Conditions: Styrene/EBiB/Cat. = 100/1/0.1 in benzonitrile at 110 °C.

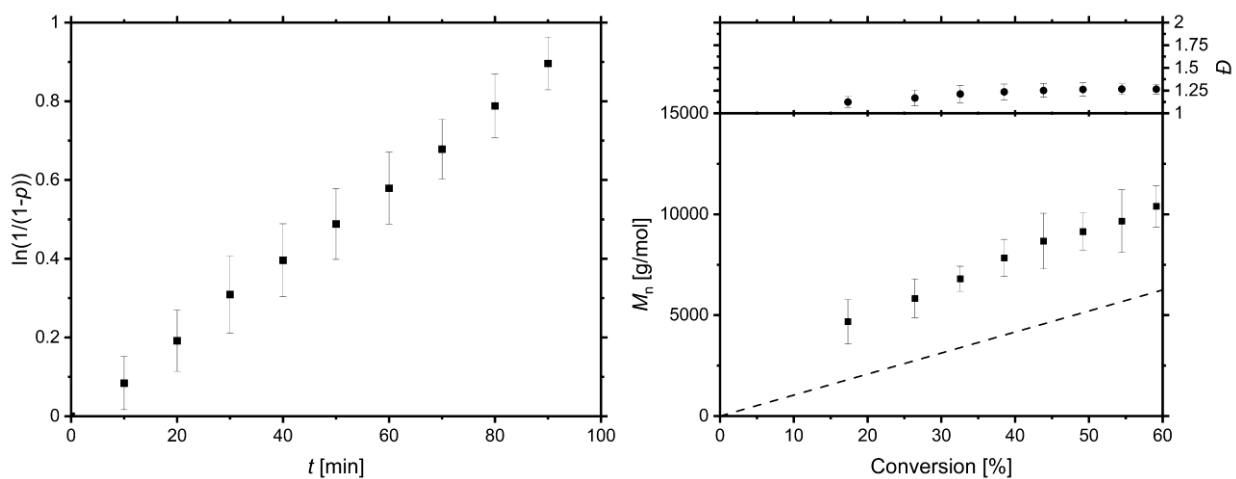

**Fig. S15** Semilogarithmic plot of conversion vs. time (left) and  $M_n/D$  vs. conversion (right) for styrene ATRP experiments with the  $\text{CuBr}/(\text{TMG4NMe}_2\text{qu})_2$  catalyst system. Conditions: Styrene/EBiB/Cat. = 100/1/1 in benzonitrile at 110 °C.

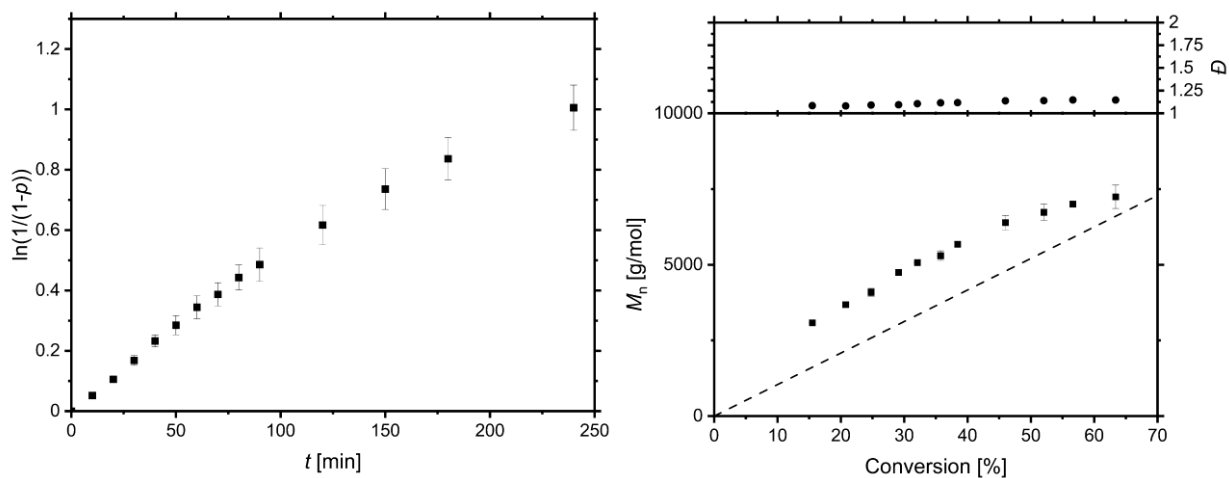

**Fig. S16** Semilogarithmic plot of conversion vs. time (left) and  $M_n/D$  vs. conversion (right) for styrene ATRP experiments with the  $\text{CuBr}/(\text{TMG4NMe}_2\text{qu})_2$  catalyst system. Conditions: Styrene/EBiB/Cat. = 100/1/0.5 in benzonitrile at 110 °C.

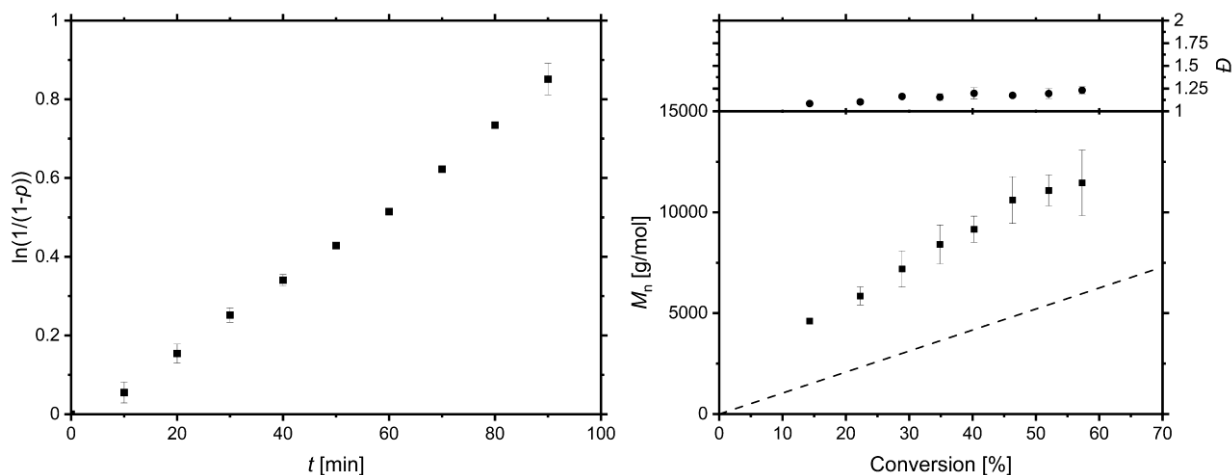

Fig. S17 Semilogarithmic plot of conversion vs. time (left) and  $M_n/D$  vs. conversion (right) for styrene ATRP experiments with the  $\text{CuBr}/(\text{DMEG4NMe}_2\text{qu})_2$  catalyst system. Conditions: Styrene/EBiB/Cat. = 100/1/1 in benzonitrile at 110 °C.

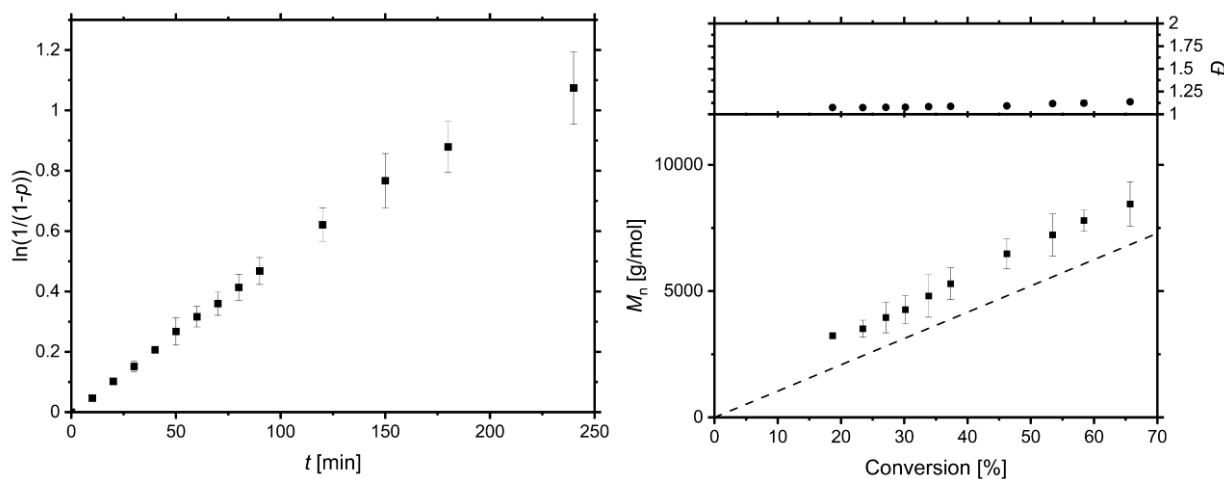

Fig. S18 Semilogarithmic plot of conversion vs. time (left) and  $M_n/D$  vs. conversion (right) for styrene ATRP experiments with the  $\text{CuBr}/(\text{DMEG4NMe}_2\text{qu})_2$  catalyst system. Conditions: Styrene/EBiB/Cat. = 100/1/0.5 in benzonitrile at 110 °C.

## ICAR ATRP experiments

Table S7 Used amounts of chemicals and ratios for ICAR ATRP experiments of styrene in benzonitrile.

|                   | Ligand     | $\text{CuBr}_2$ | EBiB      | Styrene | AIBN       | Ratio (C/I/M/AIBN) |
|-------------------|------------|-----------------|-----------|---------|------------|--------------------|
| L1 <sup>[a]</sup> | 0.19 mmol  | 0.095 mmol      | 0.19 mmol | 19 mmol | 0.285 mmol | 0.5/1/100/1.5      |
| L1 <sup>[a]</sup> | 0.038 mmol | 0.19 mmol       | 0.19 mmol | 19 mmol | 0.285 mmol | 0.1/1/100/1.5      |
| L1 <sup>[b]</sup> | 0.038 mmol | 0.19 mmol       | 0.19 mmol | 19 mmol | 0.285 mmol | 0.1/1/100/1.5      |
| L2 <sup>[a]</sup> | 0.038 mmol | 0.19 mmol       | 0.19 mmol | 19 mmol | 0.285 mmol | 0.1/1/100/1.5      |
| L2 <sup>[b]</sup> | 0.038 mmol | 0.19 mmol       | 0.19 mmol | 19 mmol | 0.285 mmol | 0.1/1/100/1.5      |
| -                 | -          | -               | 0.19 mmol | 19 mmol | 0.285 mmol | 0/1/100/1.5        |

[a] T = 60 °C, [b] T = 110 °C,

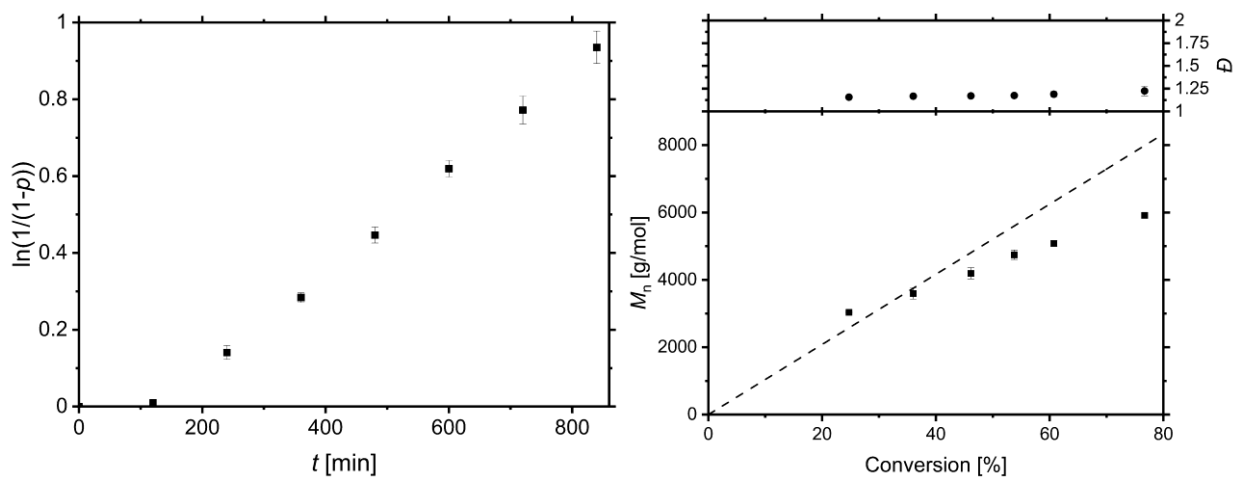

Fig. S19 Semilogarithmic plot of conversion vs. time (left) and  $M_n/D$  vs. conversion (right) for ICAR ATRP experiments of styrene with the  $\text{CuBr}_2/(\text{TMGm4NMe}_2\text{py})_2$  catalyst system. Conditions: Styrene/EBiB/Cat./AIBN = 100/1/0.5/1.5 in benzonitrile at 60 °C.

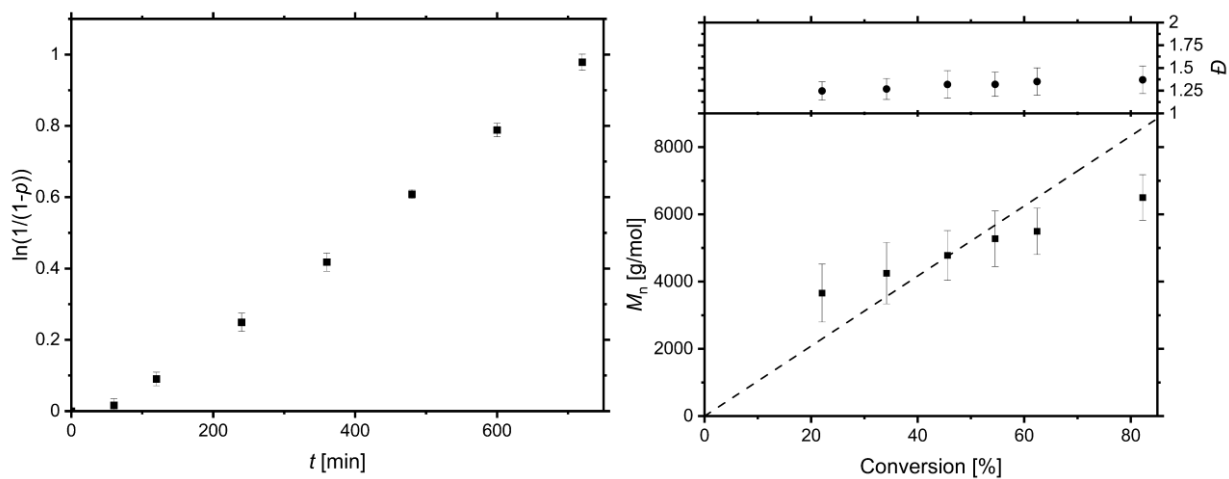

Fig. S20 Semilogarithmic plot of conversion vs. time (left) and  $M_n/D$  vs. conversion (right) for ICAR ATRP experiments of styrene with the  $\text{CuBr}_2/(\text{TMGm4NMe}_2\text{py})_2$  catalyst system. Conditions: Styrene/EBiB/Cat./AIBN = 100/1/0.1/1.5 in benzonitrile at 60 °C.

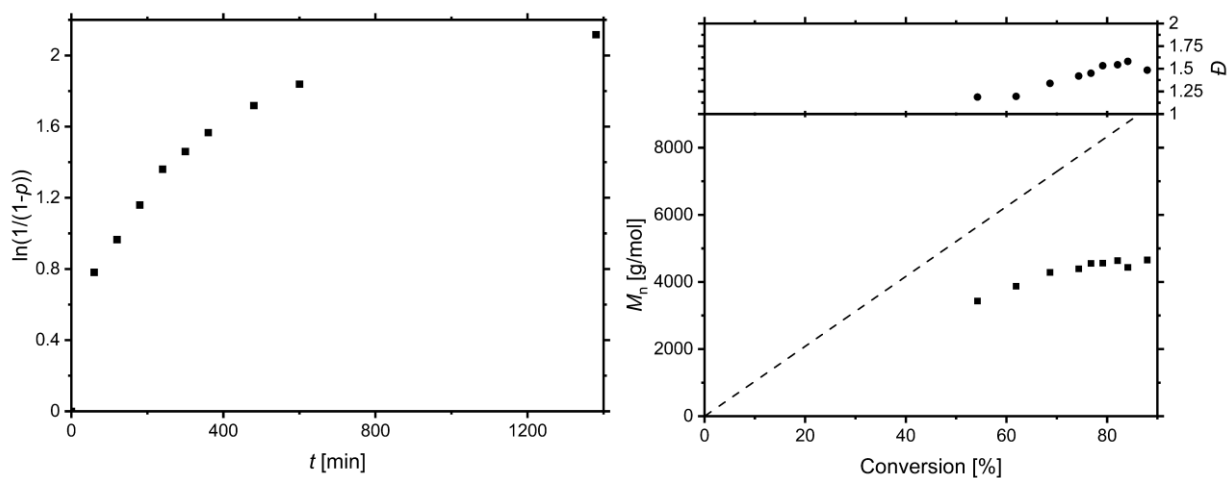

Fig. S21 Semilogarithmic plot of conversion vs. time (left) and  $M_n/D$  vs. conversion (right) for ICAR ATRP experiments of styrene with the  $\text{CuBr}_2/(\text{TMGm4NMe}_2\text{py})_2$  catalyst system. Conditions: Styrene/EBiB/Cat./AIBN = 100/1/0.1/1.5 in benzonitrile at 110 °C.

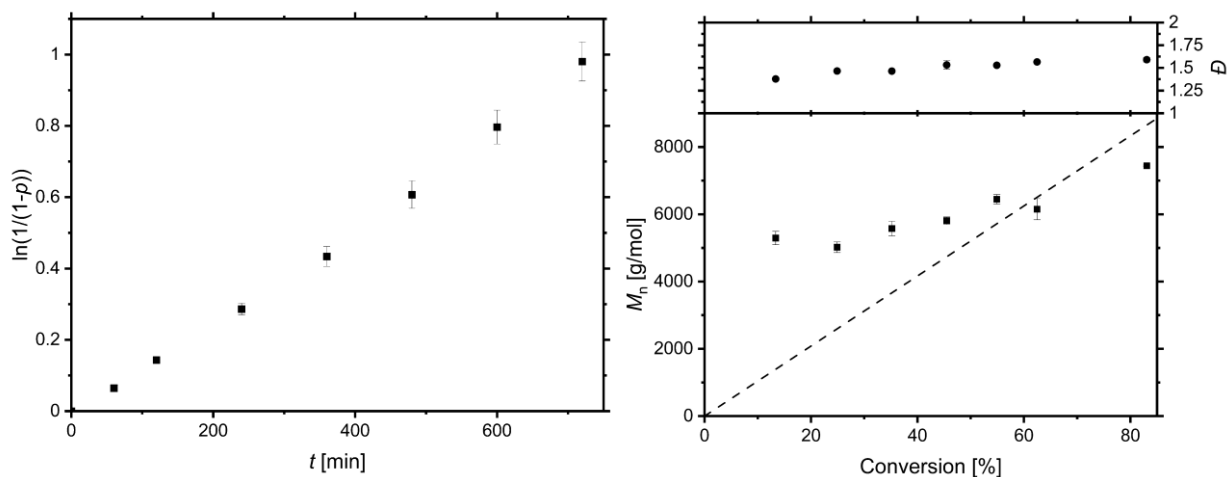

Fig. S22 Semilogarithmic plot of conversion vs. time (left) and  $M_n/D$  vs. conversion (right) for ICAR ATRP experiments of styrene with the  $\text{CuBr}_2/(\text{DMEGm4NMe}_2\text{py})_2$  catalyst system. Conditions: Styrene/EBiB/Cat./AIBN = 100/1/0.1/1.5 in benzonitrile at 60 °C.

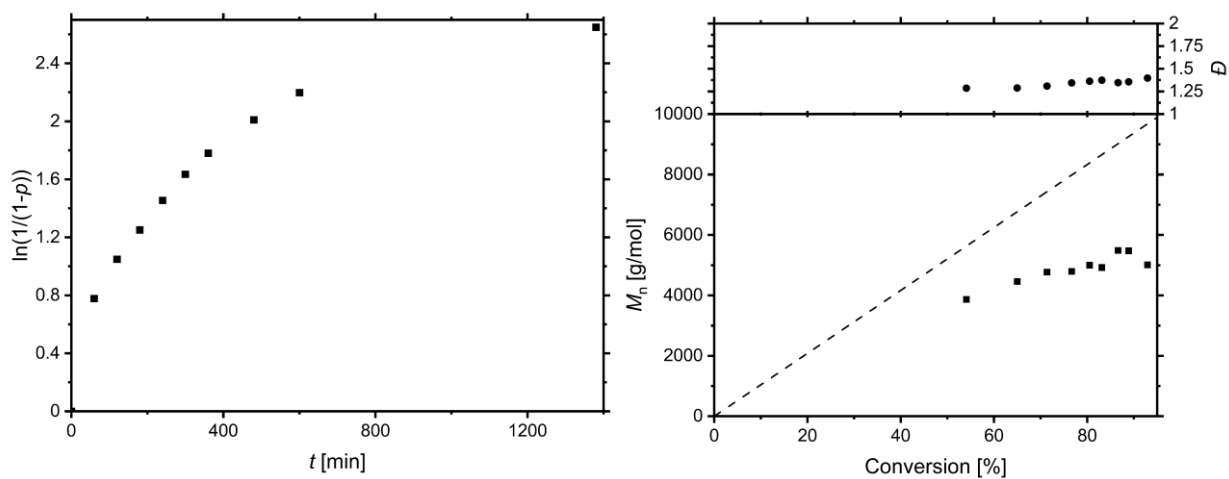

Fig. S23 Semilogarithmic plot of conversion vs. time (left) and  $M_n/D$  vs. conversion (right) for ICAR ATRP experiments of styrene with the  $\text{CuBr}_2/(\text{DMEGm4NMe}_2\text{py})_2$  catalyst system. Conditions: Styrene/EBiB/Cat./AIBN = 100/1/0.1/1.5 in benzonitrile at 110 °C.

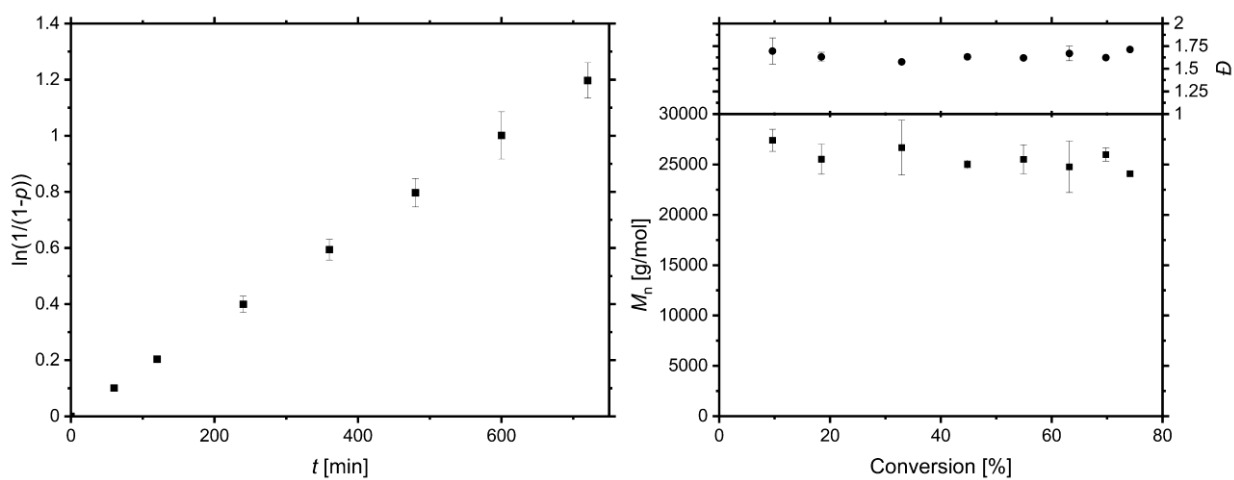

Fig. S24 Semilogarithmic plot of conversion vs. time (left) and  $M_n/D$  vs. conversion (right) for the ICAR ATRP reference experiment of styrene. Conditions: Styrene/EBiB/Cat./AIBN = 100/1/0.1/1.5 in benzonitrile at 60 °C.

## NMR-spectra

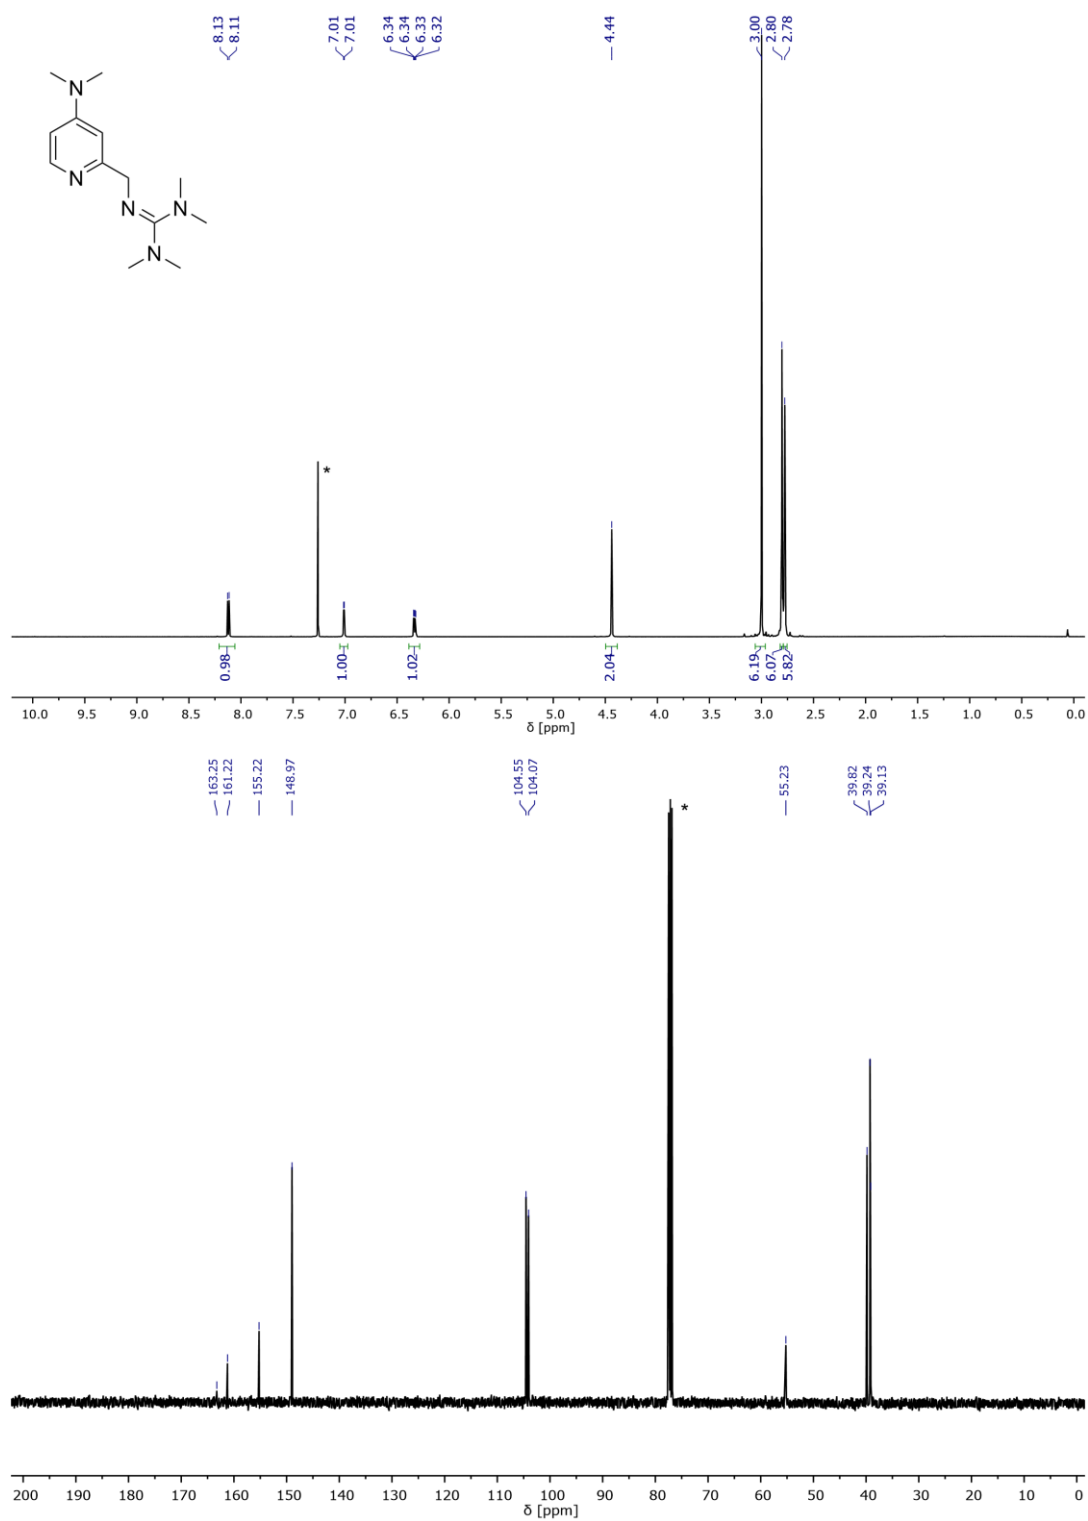

Fig. S25 <sup>1</sup>H-NMR (top) and <sup>13</sup>C-NMR (bottom) spectrum for TMGm4NMe<sub>2</sub>py (L1) in CDCl<sub>3</sub>. \*: CDCl<sub>3</sub>.

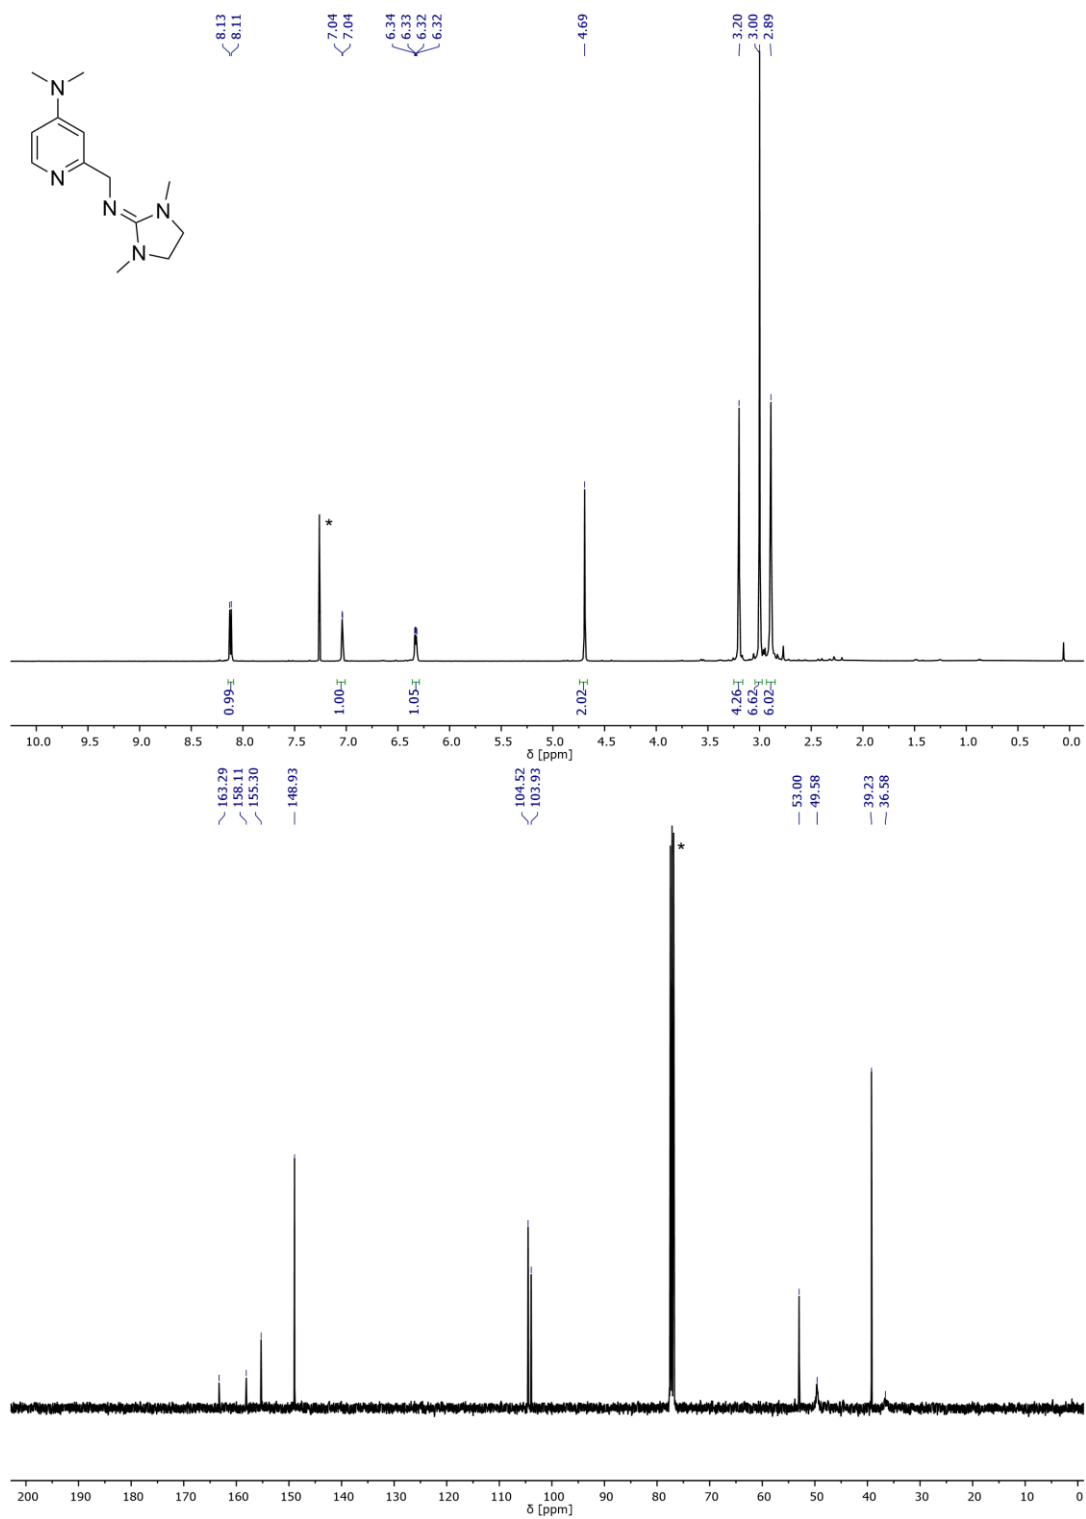

Fig. S26 <sup>1</sup>H-NMR (top) and <sup>13</sup>C-NMR (bottom) spectrum for DMEGm4NMe<sub>2</sub>py (L2) in CDCl<sub>3</sub>. \*: CDCl<sub>3</sub>.



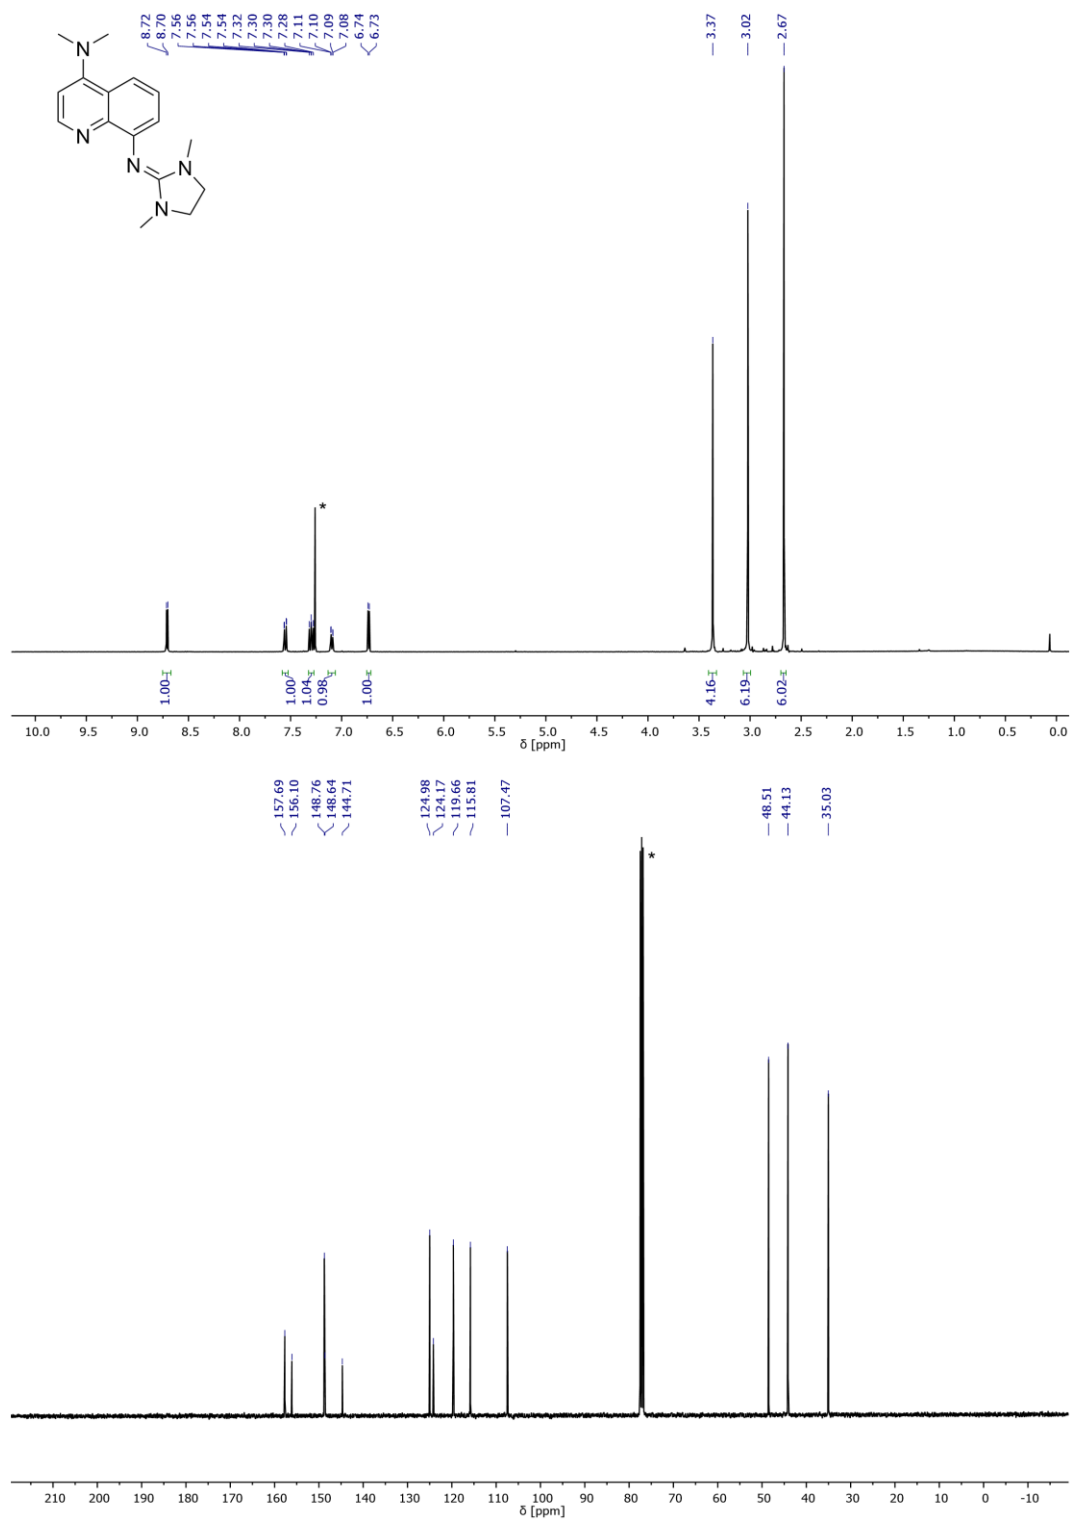

Fig. S27 <sup>1</sup>H-NMR (top) and <sup>13</sup>C-NMR (bottom) spectrum for DMEG4NMe<sub>2</sub>qu (L4) in CDCl<sub>3</sub>. \*: CDCl<sub>3</sub>.

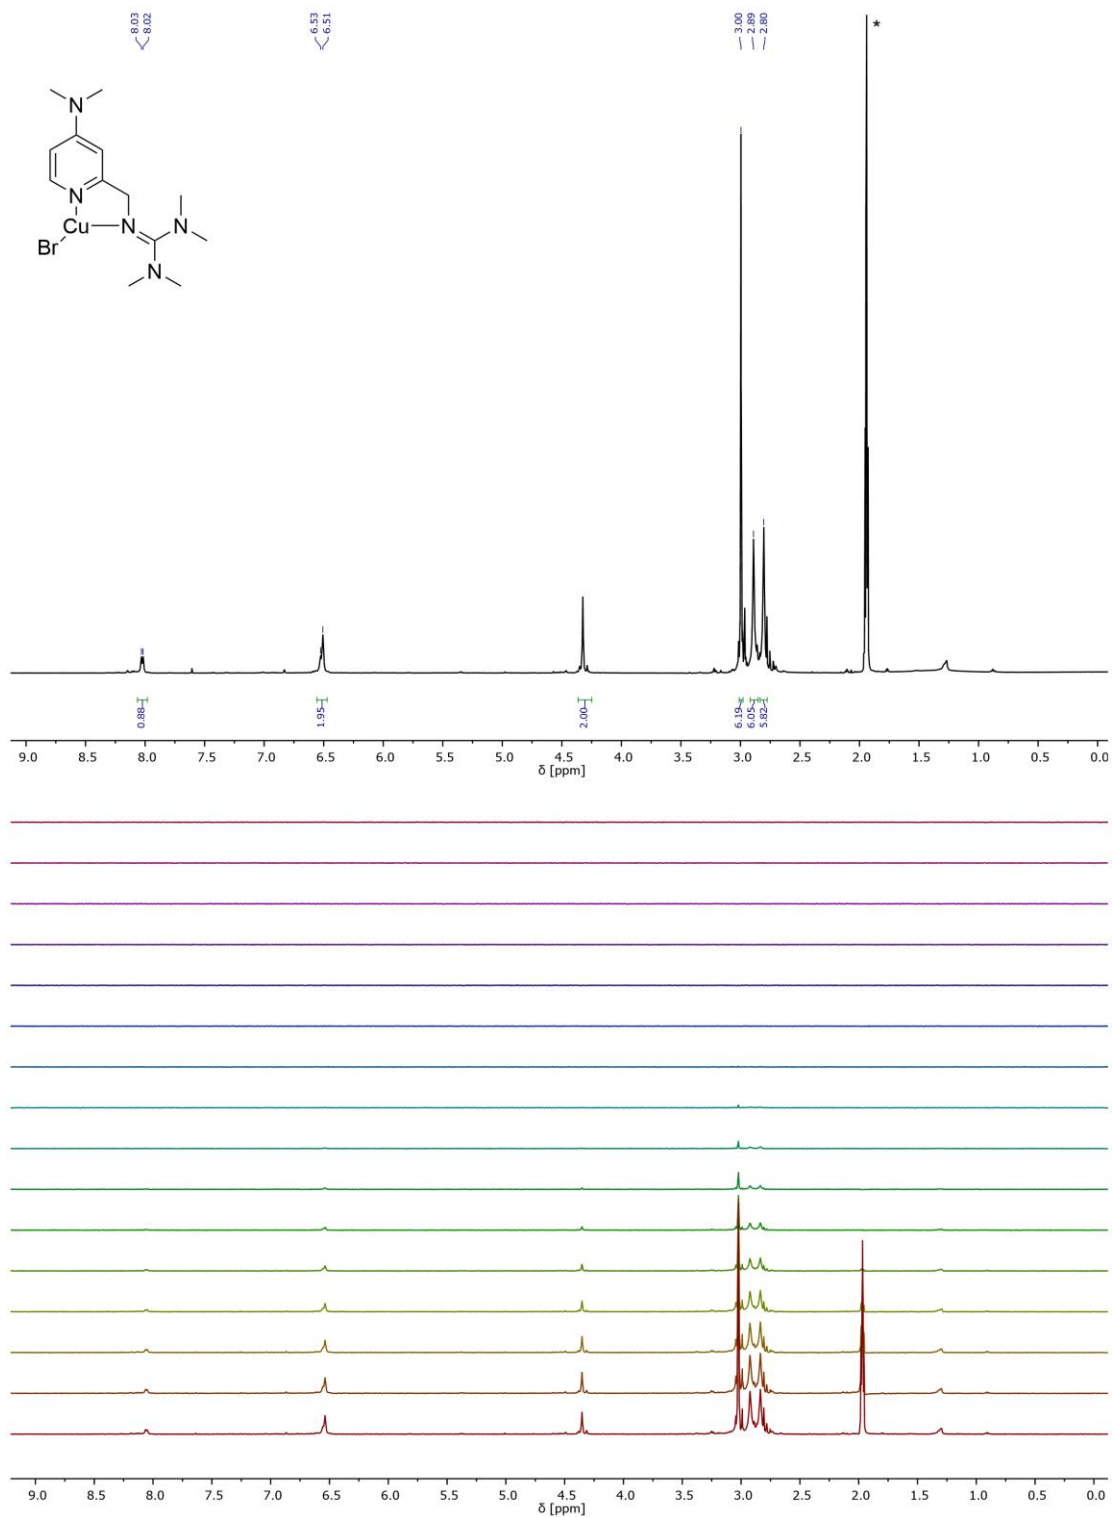

Fig. S28 <sup>1</sup>H-NMR spectrum (top) and DOSY spectrum (bottom) of the proposed complex structures of CuBr + 1 eq. TMGm4NMe<sub>2</sub>py in MeCN-*d*<sub>3</sub>. \*: MeCN-*d*<sub>3</sub>.

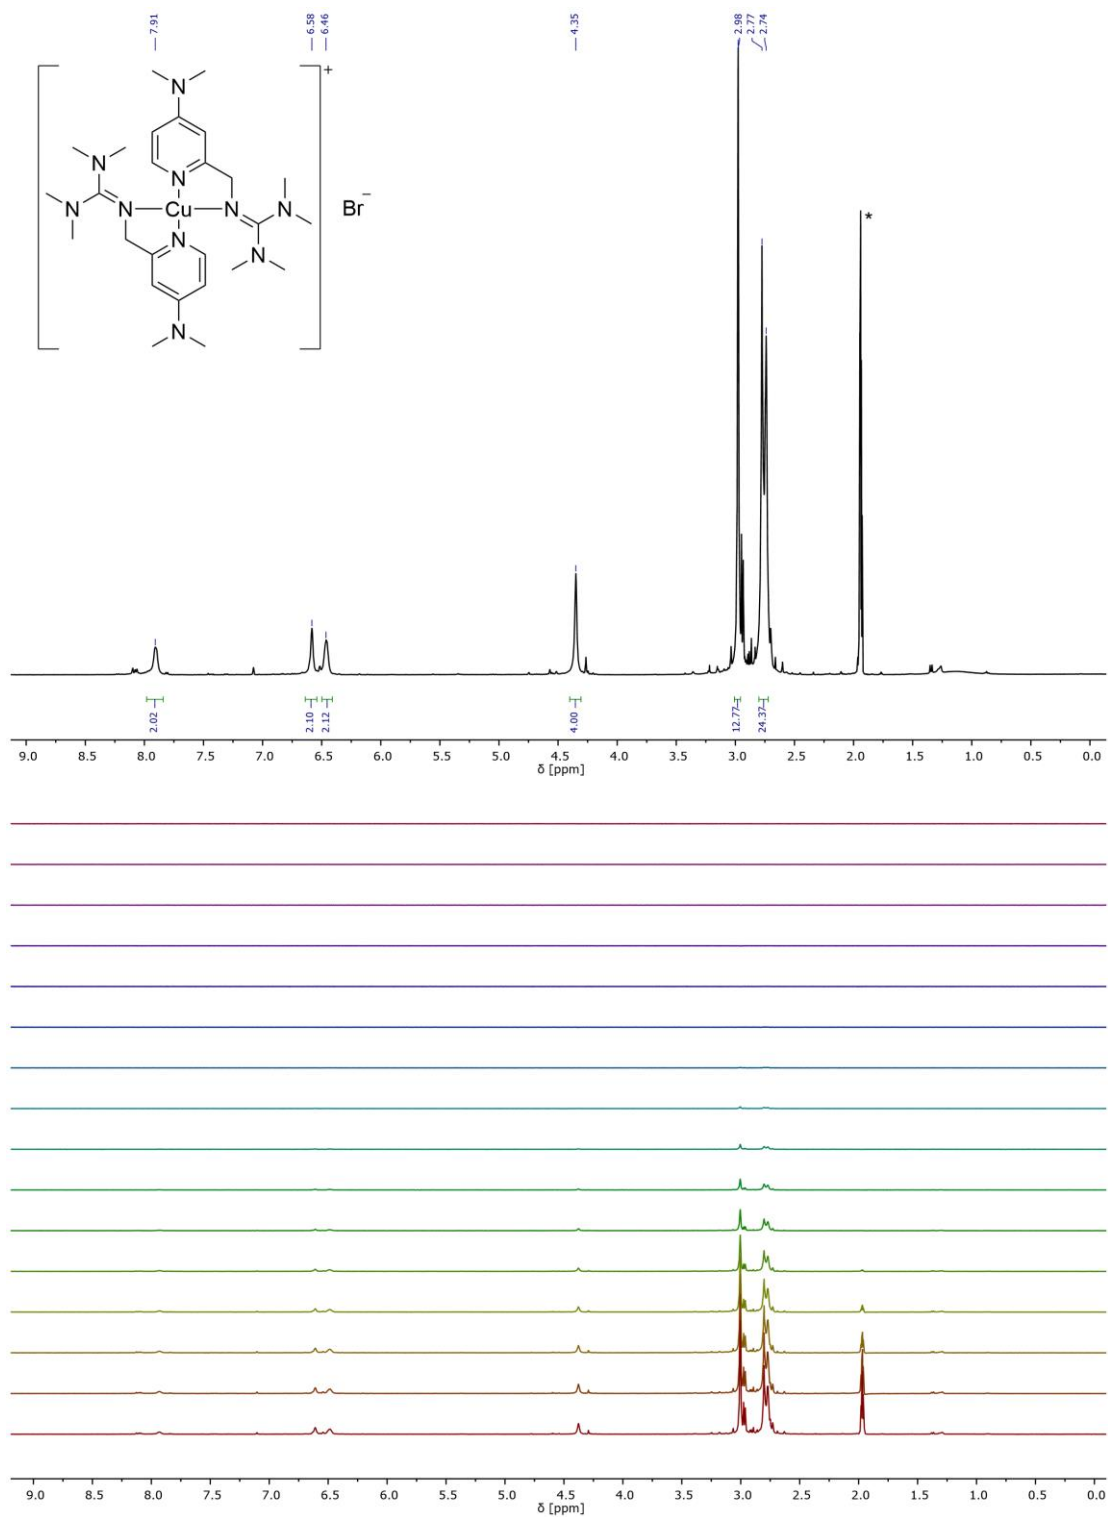

**Fig. S29**  $^1\text{H-NMR}$  spectrum (top) and DOSY spectrum (bottom) of the proposed complex structures of  $\text{CuBr} + 2 \text{ eq. TMGM4NMe}_2$  in  $\text{MeCN-d}_3$ . \*:  $\text{MeCN-d}_3$ .

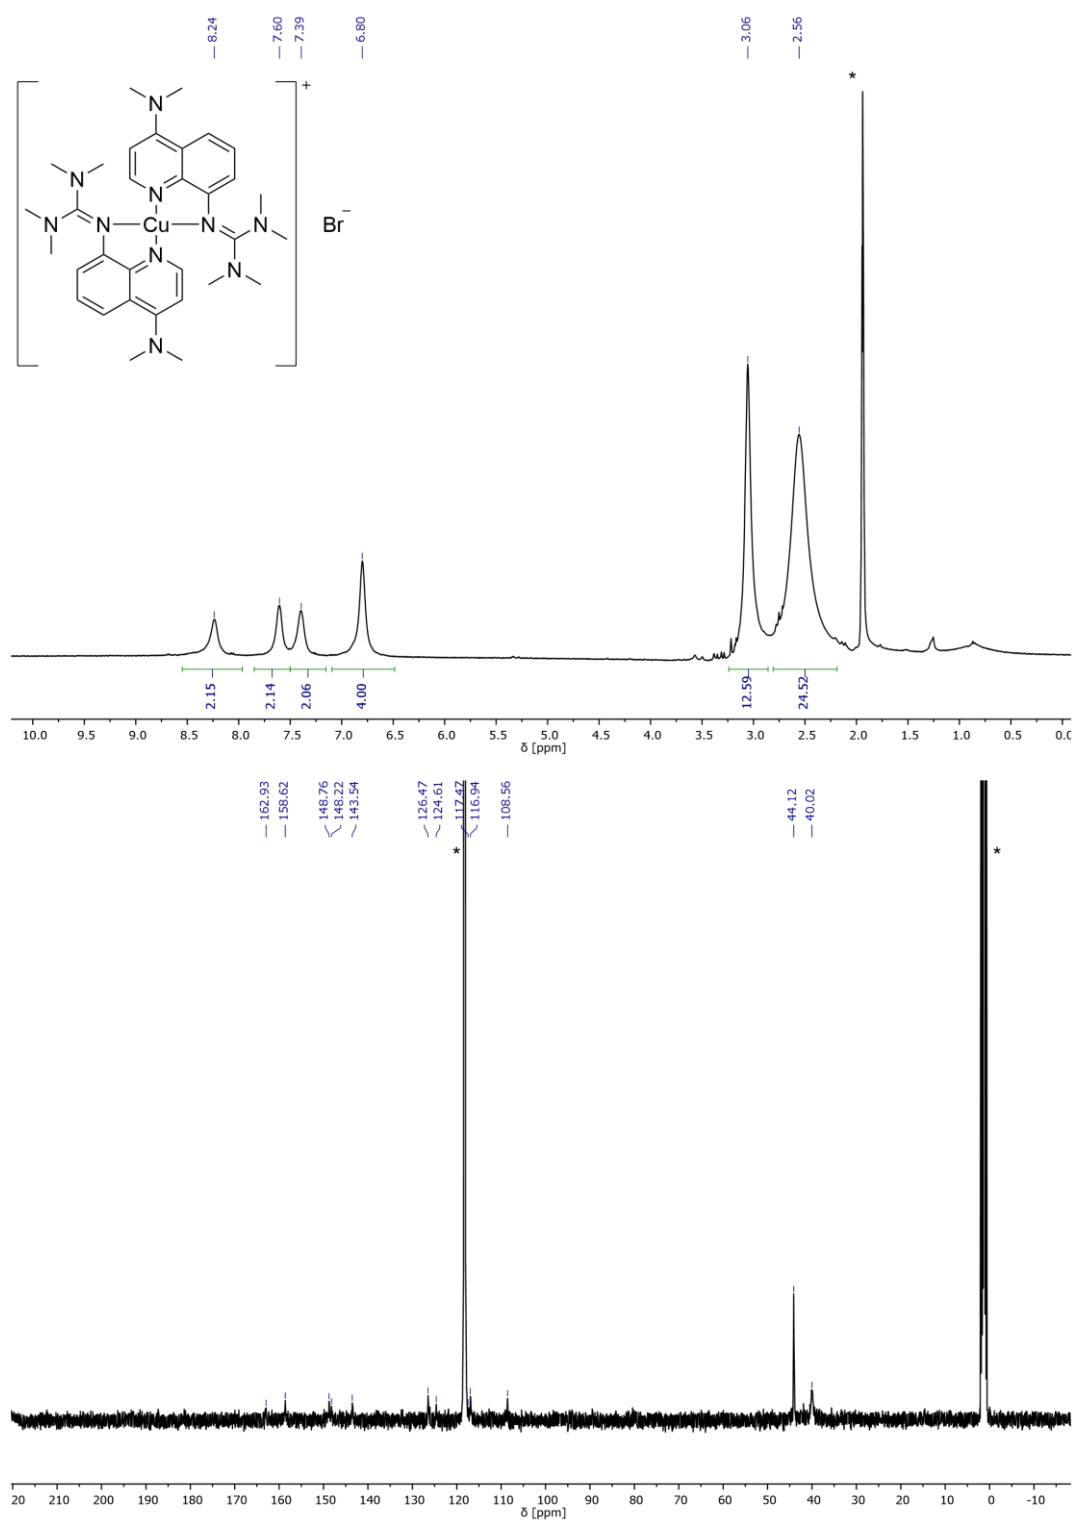

Fig. S30  $^1H$ -NMR (top) and  $^{13}C$ -NMR (bottom) spectrum for  $[Cu(TMG4NMe_2qu)_2]Br$  (C3-I) in  $MeCN-d_3$ . \*:  $MeCN-d_3$ .

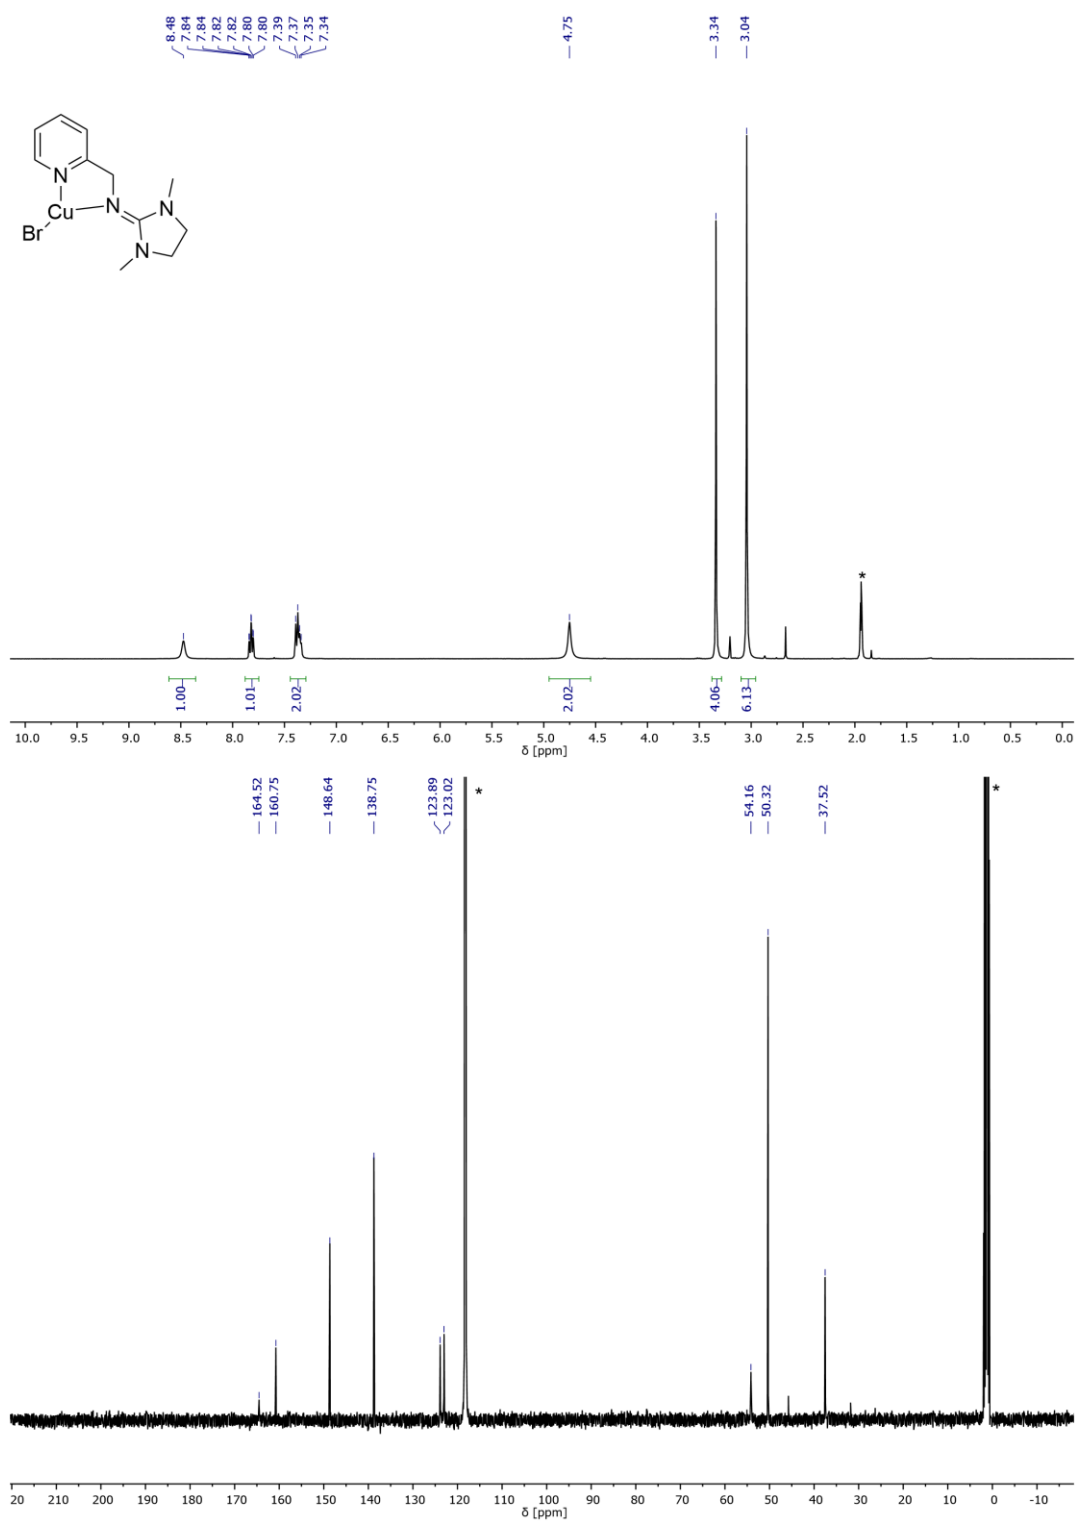

Fig. S31 <sup>1</sup>H-NMR (top) and <sup>13</sup>C-NMR (bottom) spectrum for [Cu(DMEGpy)Br] (C6-I) in MeCN-d<sub>3</sub>. \*: MeCN-d<sub>3</sub>.

## UV/Vis spectra

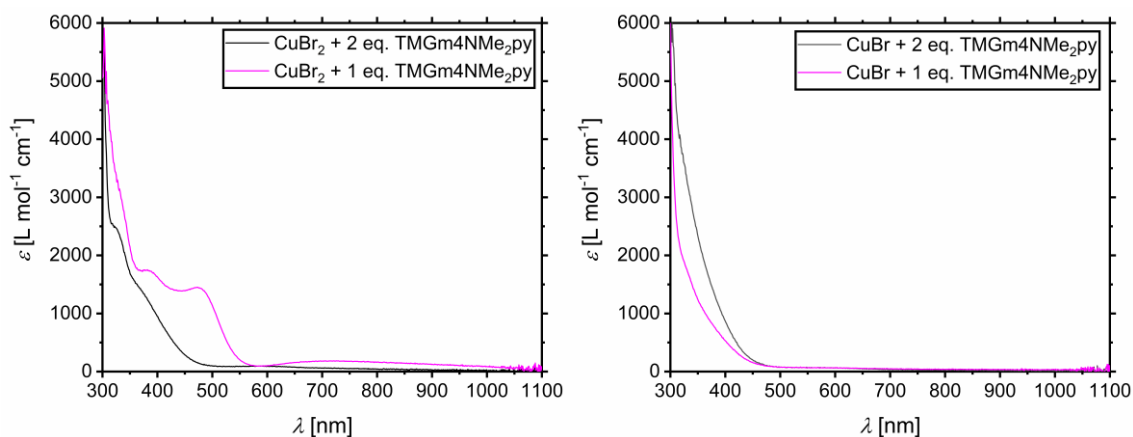

Fig. S32 UV/Vis spectra of 5 mM CuBr<sub>2</sub> (left) and CuBr (right) in MeCN with one or two added equivalents of TMGm4NMe<sub>2</sub>py (L1).

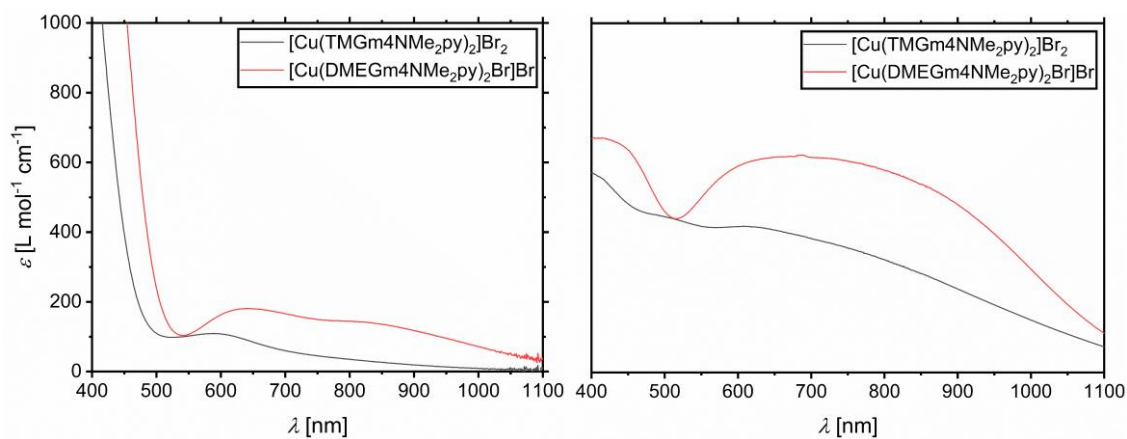

Fig. S33 UV/Vis spectra of 2.5 mM C1-B and C2 complex solutions in MeCN (left) and in the solid state (right).

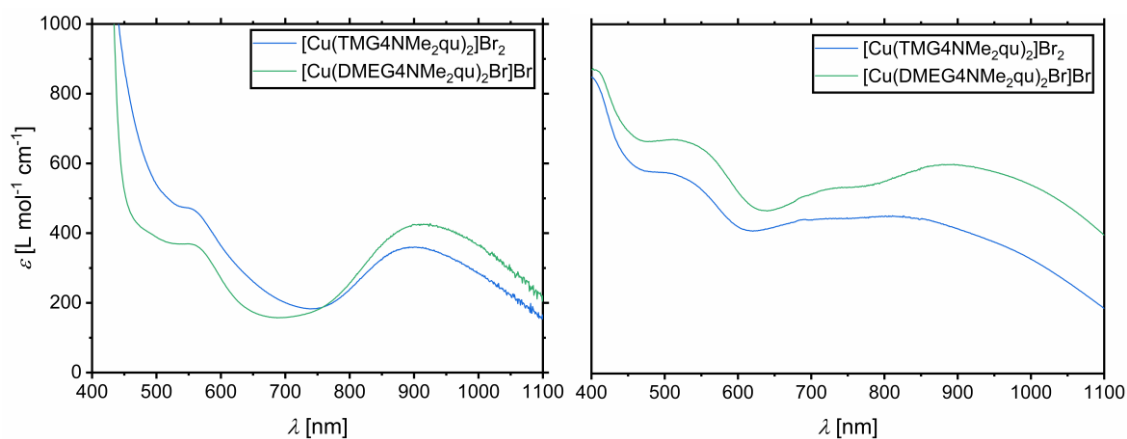

Fig. S34 UV/Vis spectra of 2.5 mM C3 and C4 complex solutions in MeCN (left) and in the solid state (right).

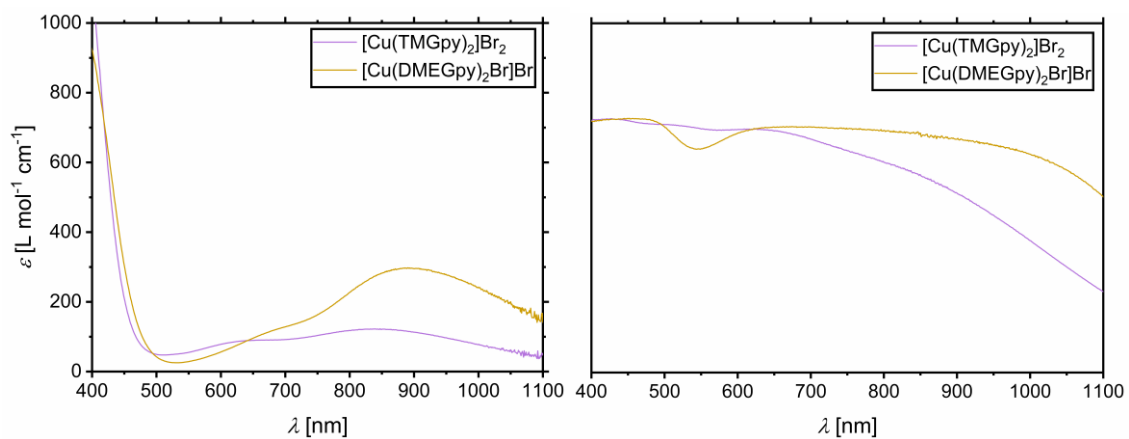

Fig. S35 UV/Vis spectra of 2.5 mM C5 and C6 complex solutions in MeCN (left) and in the solid state (right).

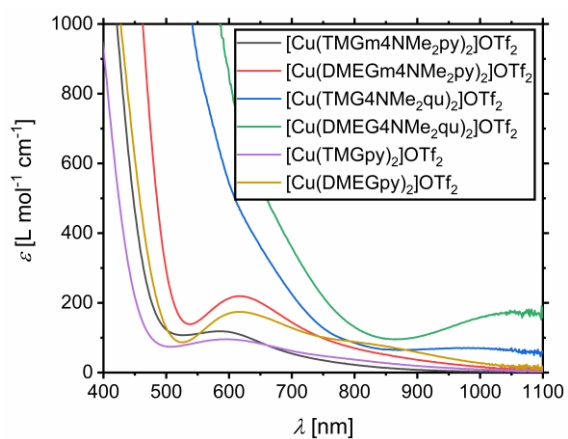

Fig. S36 UV/Vis spectra of various 2.5 mM complex solutions in MeCN.

## EPR-spectra

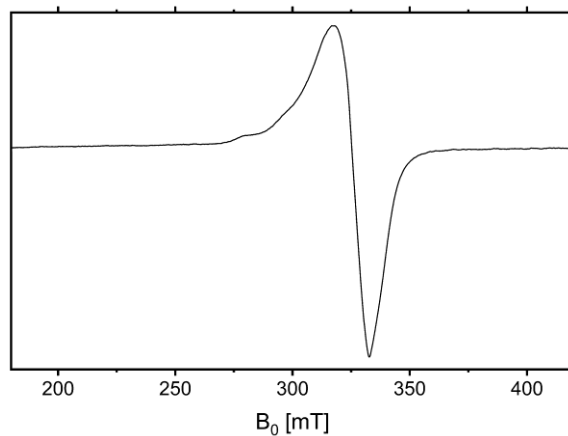

Fig. S37 Experimental X-band EPR spectra of frozen 5 mM **C2** complex solution in MeCN at 77 K.

---

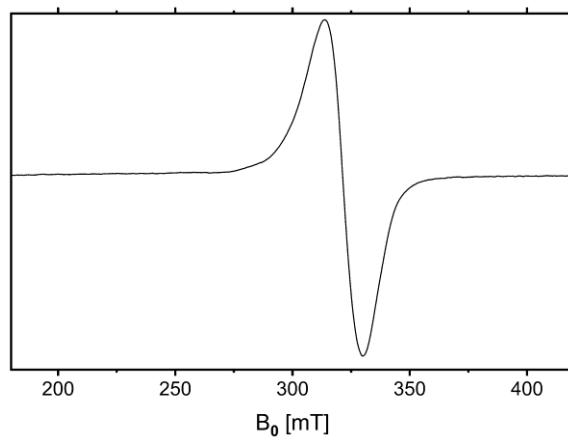

Fig. S38 Experimental X-band EPR spectra of frozen 5 mM **C3** complex solution in MeCN at 77 K.

---

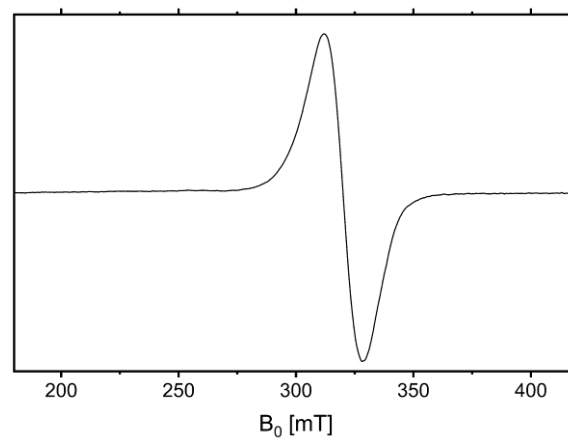

Fig. S39 Experimental X-band EPR spectra of frozen 5 mM **C4** complex solution in MeCN at 77 K.

---



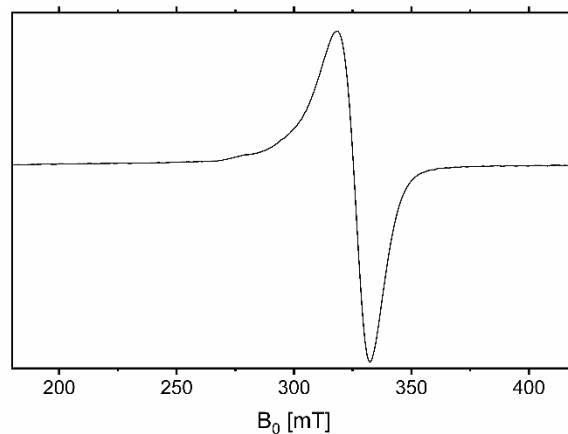

Fig. S40 Experimental X-band EPR spectra of frozen 5 mM **C5** complex solution in MeCN at 77 K.

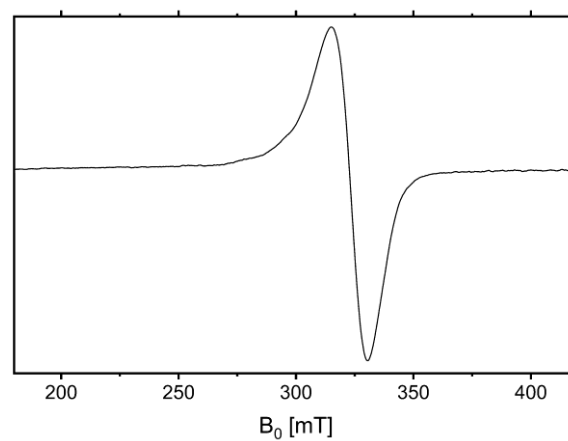

Fig. S41 Experimental X-band EPR spectra of frozen 5 mM **C6** complex solution in MeCN at 77 K.

Table S8 Landé g factors and A values of the CuBr<sub>2</sub> complexes **C1-B**, **C2**, **C3**, **C4**, **C5** and **C6**.

|           | <b>C1-B</b> | <b>C2</b>          | <b>C3</b>          | <b>C4</b>          | <b>C5</b>          | <b>C6</b>          |
|-----------|-------------|--------------------|--------------------|--------------------|--------------------|--------------------|
| $g_1$     | 1.98        | $g_{\text{iso}} =$ |
| $g_2$     | 2.06        | 2,249              | 2,249              | 2,294              | 2,294              | 2,241              |
| $g_3$     | 2.21        |                    |                    |                    |                    |                    |
| $A_1$ [G] | 46          |                    |                    |                    |                    |                    |
| $A_2$ [G] | 1           |                    |                    |                    |                    |                    |
| $A_3$ [G] | 152         |                    |                    |                    |                    |                    |

## Notes and references

- 1 T. Rösener, O. Bienemann, K. Sigl, N. Schopp, F. Schnitter, U. Flörke, A. Hoffmann, A. Döring, D. Kuckling, S. Herres-Pawlis, *Chem. Eur. J.* **2016**, *22*, 13550-13562.
- 2 L. Yang, D. R. Powell, R. P. Houser, *Dalton Trans.* **2007**, 955-964.
- 3 A. W. Addison, T. N. Rao, J. Reedijk, J. van Rijn, G. C. Verschoor, *J. Chem. Soc., Dalton Trans.* **1984**, 1349-1356.
- 4 V. Raab, K. Harms, J. Sundermeyer, B. Kovačević, Z. B. Maksić, *J. Org. Chem.* **2003**, *68*, 8790-8797.
